1 **Short Title:** Common Blue phylogeography  
2 **The dirty north: Evidence for multiple colonisations and Wolbachia infections**  
3 **shaping the genetic structure of the widespread butterfly *Polyommatus icarus***  
4 **in the British Isles**

5

6 **Saad Arif<sup>1,2\*</sup>, Michael Gerth<sup>2</sup>, William G. Hone-Millard<sup>2,3</sup>, Maria D. S. Nunes<sup>2</sup>, Leonardo**  
7 **Dapporto<sup>4</sup>, Timothy G. Shreeve<sup>2</sup>**

8 <sup>1</sup>Centre for Functional Genomics, Oxford Brookes University, OX3 0BP Oxford, United Kingdom

9 <sup>2</sup>Department of Biological and Medical Sciences, Oxford Brookes University, OX3 0BP, United  
10 Kingdom

11 <sup>3</sup>Current address: John Innes Centre, Norwich Research Park, Norwich NR4 7UH, UK

12 <sup>4</sup>ZEN lab, Department of Biology, University of Florence, Sesto Fiorentino, 50019, Italy

13 \*Author for Correspondence

14

15 **Keywords:** *Polyommatus icarus*, Lepidoptera, RAD sequencing, *Wolbachia*, endosymbiont, post-  
16 glacial recolonization; feminization, intra-specific divergence

17

18

19

20

21

22 Correspondence:

23 **Saad Arif**

24 Centre for Functional Genomics, Oxford Brookes University, OX3 0BP Oxford, United Kingdom

25 Department of Biological and Medical Sciences, Oxford Brookes University, OX3 0BP, United  
26 Kingdom

27 Tel: +44 (0)1865 483437

28 Email: [sarif@brookes.ac.uk](mailto:sarif@brookes.ac.uk)

29

30 **Abstract**

31 The paradigm of differentiation in southern refugia during glacial periods followed by expansions  
32 during interglacials, producing limited genetic diversity and population sub-division in northern areas,  
33 dominates European phylogeography. However, the existence of complex structured populations in  
34 formerly glaciated areas, and on islands connected to mainland areas during glacial maxima, call for  
35 alternative explanations. Here, we reconstruct the mtDNA phylogeography of the widespread  
36 *Polyommatus icarus* butterfly over its native range, with an emphasis on the formerly glaciated and  
37 connected British Isles. We found distinct geographical structuring of CO1 mitotypes, with an ancient  
38 lineage restricted to the marginal European areas, including Northern Scotland and Outer Hebrides.  
39 We detected perfect mtDNA-*Wolbachia* associations in Northern Britain that support the possibility of  
40 at least two post-glacial *Wolbachia*-mediated sweeps, suggesting a series of sequential replacement  
41 of mtDNA in the British Isles and potentially in Europe. Population genomic analysis, using  
42 ddRADSeq genomic markers, also reveal unexpected genetic structuring within Britain. However,  
43 weak mito-nuclear concordance suggests the potential for independent histories of nuclear *versus*  
44 mitochondrial genomes. We found clustering of genomic SNPs of French samples, with respect to  
45 those in the British Isles, is not consistent with a scenario of a single recolonisation. Taken together  
46 our mtDNA and ddRADseq observations are consistent with a history of at least two distinct  
47 colonisations, a phylogeographic scenario previously put forth to explain diversity and structuring in  
48 other British flora and fauna. Additionally, we also present preliminary evidence that *Wolbachia*-  
49 induced feminization may be occurring in the isolated population in the Outer Hebrides.

50

51

52

53

54

55

56

57

58

59

## 60 **Introduction**

61 Genetic differentiation among populations is the basis of evolution and speciation. Genetic  
62 differentiation typically emerges among allopatric populations after long-term geographic isolation.  
63 Due to changes in vicariance over geological timescales, current physical and ecological islands are  
64 not necessarily the same areas where diversification occurred. The Pleistocene period (2.6 mya  
65 (million years ago) – 11.7 kya (thousand years ago)) is characterised by a series of glacial/interglacial  
66 events. From the Last Glacial Maximum (22 kya) to c. 11.7 kya most of northern and central Europe  
67 was covered by ice caps, as well as the Alps and Pyrenees (Ehlers, Ehlers, Gibbard, & Hughes,  
68 2011) and lowered sea levels connected many islands to the mainland and to each other (Hewitt,  
69 1999). The end of the Pleistocene was characterised by a short period of rapid warming (17.5-12.8  
70 kya) followed by cooling and glacial re-advance in the Younger Dryas (12.8–11.5 kya) before the  
71 current (but variable) warm period. Most European phylogeography is rooted in events during and  
72 following the last glacial period and there are many studies showing how diversification has emerged  
73 among the three southern European peninsulas and islands (Petit *et al.*, 2003; Dapporto *et al.*, 2019;  
74 Schmitt, 2007; Seddon, Santucci, Reeve, & Hewitt, 2001; Michaux, Libois, & Filippucci, 2005; Fiera,  
75 Habel, Kunz, & Ulrich, 2016) most likely from restriction and differentiation within southern isolated  
76 refugia in long cold periods followed by northward expansion during warm periods, resulting in lower  
77 genetic diversity in colonised than refugial areas. In particular many species in northern European  
78 areas, such the British Isles, are hypothesized to have been colonized via a single post-glacial  
79 colonization event and are expected to exhibit lower genetic diversity and lack of complex genetic  
80 structuring other than that resulting from serial founder events (Dincă *et al.*, 2021; Hewitt, 1999;  
81 Mutanen *et al.*, 2012). However, the increasing availability of DNA sequences, mostly based on  
82 mitochondrial markers, has, in some cases, revealed significant genetic structuring in northern  
83 European areas. Where this has been observed, it has been explained as the product of post-glacial  
84 colonization from different populations having persisted in reduced cryptic refugia in central Europe  
85 (e.g. Provan & Bennett, 2008; Schmitt & Varga, 2012) or by bottleneck events followed by recent local  
86 adaptation accentuated by reduced dispersal in the presence of short sea straits (Tison *et al.*, 2014).  
87 Many islands which were connected to the mainland and to each other or covered by ice during the  
88 last glacial maxima also show genetically divergent populations (Cesaroni, Lucarelli, Allori, Russo, &  
89 Sbordoni, 1994; Dapporto *et al.*, 2017; Scalercio *et al.*, 2020 Tison *et al.*, 2014). In these cases,

90 successive post-glacial waves of colonization, likely driven by selective sweeps, and hampered by  
91 narrow sea straits have been hypothesized and reconstructed (Dapporto & Bruschini, 2012; Dapporto,  
92 Bruschini, Dincă, Vila, & Dennis, 2012, Tison *et al.*, 2014).

93 A major drawback of many phylogeography studies is that they rely solely on mitochondrial DNA  
94 markers - usually a 650 base pair (bp) fragment of the mitochondrial *CO1* gene (e.g. Dapporto *et al.*,  
95 2017, 2019; Dincă *et al.*, 2015; Hebert, Penton, Burns, Janzen, & Hallwachs, 2004; Lohman *et al.*,  
96 2010; Mendoza *et al.*, 2016; Smith, Woodley, Janzen, Hallwachs, & Hebert, 2006; Scalerio *et al.*  
97 2020). Mitochondrial DNA (mtDNA) markers can follow an evolutionary trajectory independent of the  
98 nuclear DNA. Due to the haploid nature and largely uniparental inheritance of the mtDNA, it has a  
99 fourfold lower effective population size compared to the nuclear genome. This lower effective  
100 population size means mtDNA loses genetic diversity *via* genetic drift at a faster rate than the nuclear  
101 genome (Charlesworth, 2009). Hence, mtDNA usually differentiates faster than the nuclear genome  
102 (Allio, Donega, Galtier, & Nabholz, 2017) during periods of isolation and will complete the process of  
103 lineage sorting more rapidly than the nuclear counterpart (Funk & Omland, 2003).

104 During range expansions (e.g. during interglacial periods) genetically differentiated lineages can  
105 meet, and in the absence of reproductive isolation, nuclear genomes can recombine and homogenize  
106 (e.g. Hinojosa *et al.*, 2019). Discordance between mtDNA and nuclear genomic variation can result  
107 from introgression of mtDNA or sex-biased asymmetries, such as sex-biased dispersal (Toews &  
108 Brelsford, 2012; Dinca et al 2021). Insects in particular are also prone to infections by reproduction  
109 manipulating endosymbionts (e.g. *Wolbachia*) that can lead to cytoplasmic incompatibilities allowing  
110 mtDNA haplotypes (or mitotypes) to hitchhike to fixation without concomitant nuclear differentiation  
111 (Hurst & Jiggins, 2005). Hence, mtDNA variation by itself may provide an incomplete demographic  
112 history and should be complemented with neutral nuclear genetic markers in order to more accurately  
113 describe key demographic events, facilitate phylogeographic interpretations and delineate  
114 independent evolutionary lineages (Edwards, Potter, Schmitt, Bragg, & Moritz, 2016; Galtier, Nabholz,  
115 Glémin, & Hurst, 2009).

116 Endosymbionts like *Wolbachia* are well known for their ability to induce cytoplasmic incompatibility  
117 (*9CI*) but may also alter host reproduction in other ways including male-killing (MK) and physiological  
118 feminization of genetic males (Makepeace & Gill, 2016) . Although MK has been recorded in several  
119 instances in Lepidoptera and other insect groups, feminization has been observed much less

120 frequently. Such reproduction manipulation strategies can have profound influence on host ecology  
121 and evolution (Drew, Frost, & Hurst, 2019). For example, bidirectional CI which leads to break down  
122 in reproduction between hosts harbouring different strains is expected to promote genetic divergence  
123 and potentially even speciation (Brucker & Bordenstein, 2012).

124 To understand how genetic structuring can emerge in formerly connected and glaciated areas, we  
125 focused on the British Isles, the largest European island system, which were connected to the  
126 European mainland until c. 8.0 kya but were covered by an ice cap up to 18.0 kya to the latitude of  
127 51-53N degrees (Gibbard & Clark, 2011) with tundra and permafrost during the Younger Dryas  
128 period. The colonization of British islands by insects has been mostly dated from c. 13-10 kya  
129 (Atkinson, Briffa, & Coope, 1987; Coard & Chamberlain, 2016). We selected the Palearctic butterfly  
130 *Polyommatus Icarus* as a model species because of its abundance and widespread distribution. This  
131 species occupies a range of open biotopes including grasslands, sand dune systems and waste sites  
132 over a range of elevational gradients but is a host-plant specialist, with larvae feeding on low growing  
133 Fabaceae (chiefly *Lotus corniculatus*).

134 Phylogeographic analysis of this species across continental Europe and Asia recovered five divergent  
135 CO1 lineages (Palaeartic, Iberia-Italy, Sierra-Nevada, Alicante-Provence and Crete), resulting  
136 presumably from multiple expansion/contraction cycles during the Pleistocene (Dincă, Dapporto, &  
137 Vila, 2011). More specifically, Bayesian divergence dating and ancestral range reconstruction  
138 suggests the existence of Palaeartic and southern European lineages ca. 1.8 mya. More recently  
139 (ca. 0.5 mya) there was an expansion of the Palearctic lineage into southern European refugia  
140 followed by divergence into a northern (Palaeartic) and southern European (Iberia-Italy) lineage. The  
141 expansion of the latter is concomitant with the range contraction and continued divergence of the  
142 ancient southern lineage into highly endemic and isolated lineages in the Sierra-Nevada, Alicante-  
143 Provence and Crete.

144 The phylogeography of this species in the UK remains unknown since no specimens from British  
145 islands were analysed by Dincă *et al.*'s (2011). However, Dincă *et al.*'s (2011) dating and range  
146 reconstruction on continental Europe suggests that the colonization of the British Isles likely consisted  
147 of a single or potentially two lineages (Palaeractic and/or Iberia-Italy). Additionally, an allozyme  
148 analysis suggested populations in the British Isles may have undergone a bottleneck (de Keyser,  
149 Shreeve, Breuker, Hails, & Schmitt, 2012), likely during the Younger Dryas period following

150 colonisation in the early Holocene. However, It has also been suggested that the colonization of the  
151 British Isles by *P. icarus* could have involved more than one period of establishment following the Last  
152 Glacial Maximum (Dennis, 1977). Physiological differences (Howe, Bryant, & Shreeve, 2007) have  
153 been identified between populations in different parts of the British Isles, with Outer Hebrides  
154 populations flying with lower thoracic temperatures than southern populations. Additionally, modelling  
155 flight activity responses under climate change scenarios predicts differences in response to climate  
156 change between Outer Hebridean and mainland populations (Howe *et al.*, 2007). Differences in life-  
157 history strategies also exist, with northern populations being (potentially obligate) univoltine (one  
158 brood of offspring annually) whilst southern ones are facultative polyvoltine (> two to three broods of  
159 offspring annually)(de Keyser, 2012). There is thus potential for British islands to host genetically  
160 structured populations of *P. icarus* despite the relatively recent colonization.

161 Here, we describe comprehensively *P. icarus* mtDNA diversity and distribution in the British Isles and  
162 across the species' entire native range. Focussing on the British Isles we then use genome-wide  
163 ddRADseq genetic markers to determine concordance with mtDNA to infer the potential colonization  
164 history of the British Isles. We also leveraged the ddRADseq data to conduct a survey of *Wolbachia*  
165 infection in *P. icarus*, in the British Isles, to integrate any influence of *Wolbachia* sweeps on our  
166 phylogeographic interpretations. We compare British Isles with European mtDNA data to infer  
167 possible invasion sequences into the British Isles. We compare our findings with existing  
168 interpretations of the phylogeography of *P. icarus* throughout Europe and demonstrate that combining  
169 mtDNA sequence data with nuclear genetic markers derived from genome-wide ddRADseq data and  
170 *Wolbachia* sequence data can provide comprehensive data for phylogeographic inferences. In  
171 addition, we also provide some preliminary evidence for the phenotypic effects of *Wolbachia* in the  
172 northern populations of the British Isles, including the possibility of a rare case of feminization.

173

## 174 **Materials and Methods**

### 175 ***Sample collection and CO1 sequencing***

176 We sampled 190 butterflies from 14 sites spread across the British Isles together with a single site in  
177 central-southern France (Table S1, Figure S1) to serve as a reference out-group. Numbers of  
178 individuals collected per site varied between 6-15, with an average of 13. We aimed to collect similar

179 numbers of males and females from each site, but our samples are male biased, due to cryptic female  
180 behaviour. Butterflies were sexed based on wing colouring and pattern dimorphism and abdominal tip  
181 morphology. We removed heads and legs of individuals anesthetized on ice and stored these in 95%  
182 ethanol for DNA extraction. Wings and bodies were dried and stored separately as specimen  
183 vouchers.

184 We sequenced a 655 bp fragment of *cytochrome c oxidase subunit 1 (CO1)* for a subset of 140  
185 individuals (Table S2). The fragment was amplified by PCR using primers piLepF1 (5`-  
186 TCTACAAATCATAAAGATATTGGAAC-3`) and LepR1 (5`-TAAACTTCTGGATGTCCAAAAAATCA-  
187 3`) (Hebert *et al.*, 2004) using OneTaq Mastermix with standard buffer (New England Biolabs) under  
188 standard cycling conditions. The resulting sequences were trimmed for primers and quality and then  
189 aligned using AliView (Larsson, 2014).

190

### 191 ***Reconstruction of CO1 haplogroups in Europe and the British Isles***

192 To determine the phylogenetic relationships of British *P. icarus* with those elsewhere in Europe (Dincă  
193 *et al.*, 2011) we used our newly generated *CO1* sequences and publicly available *P. icarus CO1* DNA  
194 sequences from Europe and Eurasia archived in the Barcode of Life Data Systems (Ratnasingham &  
195 Herbert, 2007) and NCBI's GenBank database. Sequences were trimmed for primers and quality and  
196 then aligned using AliView (Larsson, 2014) and truncated or potential contaminant sequences were  
197 removed, resulting in a final alignment of 585 specimens with length between 610-658 bp (Table S2).  
198 We constructed mitochondrial haplotype networks using the *CO1* alignments and TCS networks as  
199 implemented in *TCS 1.21* (Clement, Posada, & Crandall, 2000) by imposing a 95% connection limit  
200 (11 steps). Different haplogroups have been identified by creating a UPGMA dendrogram based on p-  
201 distances and calculated with the "dist.dna" function of the "ape" package (Paradis & Schliep, 2019).  
202 Hierarchical clustering was performed using the hclust function in R v.3.6.2 (R Core Team, 2019).  
203 Following the Dincă *et al.* (2011) assessment, we cut the tree at the depth of the fourth node using the  
204 "cutree" function to obtain 5 groups (based on Dincă *et al.*, (2011)). The geographic distributions of  
205 these groups are visualised on a map using pie charts, with each group assigned a specific colour.

206

207

## 208 ***ddRADseq library construction, sequencing, and SNP filtering***

209 DNA was extracted from head and legs of all 190 individual butterflies using a salt extraction protocol  
210 (Miller, Dykes, & Polesky, 1988) and eluted in 60  $\mu$ l of dH<sub>2</sub>O. DNA was quantified using a Qubit 2.0  
211 flourometer (Life Technologies) using a Qubit dsDNA high sensitivity assay kit (Life Technologies)  
212 and individual DNA samples for ddRADseq libraries were normalized to 10 ng/ $\mu$ l. Library preparation  
213 was performed at Floragenex (Portland, Oregon) following a protocol similar to Han *et al.* (2018) using  
214 a digestion with PstI/MseI along with a SBG 100-Kit v2.0 (Keygene N.V., Wageningen, the  
215 Netherlands). Barcoded samples were sequenced over two lanes at the University of Oregon  
216 Genomics and Cell Characterization Facility (Eugene, Oregon) on a HiSeq4000 with single-end  
217 100bp chemistry.

218 We used Stacks 2.4 (Catchen, Hohenlohe, Bassham, Amores, & Cresko, 2013) to assemble RAD loci  
219 and call SNP genotypes from the raw ddRADseq data. Raw reads were demultiplexed using the  
220 process\_radtags.pl script while discarding low quality reads (< 10 average Phred score) and removing  
221 any restriction site tags. After demultiplexing and discarding low quality reads, three individuals were  
222 removed from the final assembly due to low number of reads (<500,000; Table S3). We initially used  
223 a subset of 24 individuals to determine optimal combinations of the major parameters ( $m$ : minimum  
224 number of raw reads required to call a stack,  $M$ : number of mismatches allowed between stacks,  $n$ :  
225 number of mismatches allowed between loci of different individuals) involved in assembling RAD loci  
226 with Stacks following guidelines in Paris, Stevens, and Catchen (2017) and Rochette and Catchen  
227 (2017). We varied values of  $m$  from 2-12, while holding  $M$  and  $n$  constant at 2, and evaluated how the  
228 number of RAD loci and number of polymorphic loci present in 80% of the samples (r80 rule; Paris *et*  
229 *al.*, 2017) stabilized as a function of  $m$ . After, obtaining a suitable value for  $m$ , we varied  $M$  and  $n$  from  
230 1-8, with the constraint that  $M=n$  (Rochette & Catchen, 2017), and used the r80 rule and checked for  
231 stability of the proportion of loci with 1-5 SNPs to determine suitable values for  $M$  and  $n$ . The number  
232 of total and polymorphic RAD loci begin to stabilize around a value of 4 for all three major parameters  
233 ( $m$ ,  $M$ , and  $n$ ; Figure S2). The value of  $M=n=4$  at  $m=4$  was sufficient to stabilize the distribution of loci  
234 with 1-5 SNPS (Figure S3) and was used to assemble the final set of RAD loci. The average number  
235 of reads per individual was 2.95 million (standard deviation (sd): 1.09 million; Table S3). The average  
236 coverage per locus after assembling stacks was 45.8x (sd: 14.57x). SNP markers with minimum allele  
237 frequencies of < 0.05 and a maximum observed heterozygosity > 0.65 (to exclude potential



238 paralogues) were further excluded. To obtain a set of widely available loci for downstream population  
239 genomic analysis, we only retained SNPs that were present in at least 50% ( $r=50$ ) of the individuals  
240 within the 15 sampled localities ( $p=15$ ) which yielded 4852 loci, 1915 of which were monomorphic.

241 To remove any contamination of our ddRADseq markers with mitochondrial DNA we used Centrifuge  
242 v.1.0.4 (Kim, Song, Breitwieser, & Salzberg, 2016) to search all RAD loci against NCBI's database of  
243 mitochondrial RefSeq Genomes (<https://www.ncbi.nlm.nih.gov/genome/organelle/>), which includes  
244 complete mitogenomes of several Lepidopteran species. We also excluded contamination from  
245 *Wolbachia* using Centrifuge to search RAD loci against the Archaeal and Bacterial RefSeq Genomes  
246 in the NCBI database  
247 ([ftp://ftp.ccb.jhu.edu/pub/infphilo/centrifuge/data/p\\_compressed\\_2018\\_4\\_15.tar.gz](ftp://ftp.ccb.jhu.edu/pub/infphilo/centrifuge/data/p_compressed_2018_4_15.tar.gz)).

248 Finally, we used vcftools v0.1.17 (Danecek *et al.*, 2011) to further exclude any loci with greater than 5  
249 SNPs (potentially erroneous loci) and then generated two SNP data sets filtered on levels of missing  
250 data per individual: one that excluded individuals with > 50% missing data ( $p15r50miss50$ ) and  
251 another excluding individuals with > 25% missing data ( $p15r50miss25$ ). This resulted in two biallelic  
252 SNP datasets with 2,824 loci and 5,592 SNPs. The dataset  $p15r50miss50$  consisted of 176  
253 individuals and the dataset  $p15r50miss25$  had 148 individuals. We generated two additional marker  
254 datasets, using the exact same procedure as above, but with a more stringent requirement to only  
255 retain SNPs that were present in at least 60% ( $p15r60miss25$ ) or 70 % ( $p15r70miss25$ ) of the  
256 individuals within each locality.

257

### 258 ***Population structure based on putatively neutral and outlier ddRADseq markers***

259 To examine genomic level population structure we conducted Principal Component Analysis (PCA) on  
260 the Stacks derived and filtered SNP datasets using the package ade4 v.1.7-13 (Dray & Dufour, 2007)  
261 in R v3.6.2 (R Core Team, 2019). To assess the impact of missing data in reconstructing population  
262 structure we performed PCAs on the two datasets filtered for individuals with different thresholds of  
263 missing data ( $p15r50miss50$  or  $p15r50miss25$ ). As linked SNPs can influence population clustering  
264 techniques like PCA we performed a further PCA on the  $p15r50miss25$  dataset but retaining only a  
265 single SNP per RAD locus. Additionally, to assess the influence of varying number of RAD markers

266 on population structure, we also conducted PCA on SNP datasets with more stringent inclusion  
267 criteria on the availability of loci (datasets *p15r60miss25* or *p15r70miss25*).

268 To differentiate population structure arising from demographic and historical processes *versus* those  
269 potentially due to local adaptation or natural selection, we partitioned the *p15r50miss25* SNPs into  
270 outlier and putatively neutral loci (Allendorf, Hohenlohe, & Luikart, 2010). We detected outlier loci  
271 using Bayescan v2.1 (Foll and Gaggiotti, 2008) and a maximum likelihood based approach as  
272 implemented in OutFLANK v. 0.2 (Whitlock & Lotterhos, 2015). Bayescan was run with default  
273 settings except that we used 1:100 prior odds and 100,000 iterations and a burn in of 50,000. We  
274 used a false discovery rate (FDR) of 1% as a cut-off for classifying a SNP as an outlier. OutFLANK  
275 was run with default settings and a false discovery rate of 5%, with an expectation of generating more  
276 conservative results (Whitlock & Lotterhos, 2015). The FRN (out-group) and RVS (southern Scotland,  
277 sample size < 5) samples were filtered while detecting outliers using either method. The union of the  
278 set of all SNPs detected by both in the *p15r50miss25* were treated as outlier SNPs. The union of all  
279 loci associated with these outlier SNPs were removed from the *p15r50miss25* dataset to generate a  
280 dataset of putatively neutral SNPs, thus generating sets of outlier and putatively neutral loci. PCAs  
281 were then performed individually for the outlier and putatively neutral SNP datasets.

282 We also calculated pairwise Weir and Cockerham  $F_{st}$  between all 15 populations, for both outlier and  
283 putatively neutral SNP datasets, using the R package dartR 1.1.11 (Gruber, Unmack, Berry, &  
284 Georges, 2018) on the *p15r50miss25* dataset. Statistical significance between each pairwise  $F_{st}$  was  
285 determined using 10000 bootstrap replicates. We used fineRadstructure and RADpainter (Malinsky,  
286 Trucchi, Lawson, & Falush, 2018) to assess fine-scale population structure based on shared genetic  
287 co-ancestry using only the putatively neutral SNPs.

288

### 289 ***Assessing concordance between mtDNA and genomic markers***

290 We used an analysis of molecular variance (AMOVA) to assess the concordance between mtDNA  
291 variation and the putatively nuclear loci as derived from ddRADseq data. Individuals were assigned to  
292 groupings based on clustering of *CO1* sequences (as above) to assess how genomic variation  
293 partitioned based on mtDNA haplogroup. Strong concordance between mtDNA and genomic variation  
294 would be supportive of a hypothesis of multiple discrete colonisation events. AMOVA was performed

295 on the *p15r50miss25SNPs* data using the R package *poppr* v.2.8.3 (Kamvar, Tabima, & Grünwald,  
296 2014). Samples from France were excluded for this analysis and statistical significance was assessed  
297 with 10,000 permutations.

298

### 299 ***Predicting Wolbachia infection in individuals***

300 To predict *Wolbachia* infection in each individual, we searched each read from demultiplexed  
301 individual fastq files (generated in the initial stages of the Stacks 2.4 pipeline using *process\_radtags*)  
302 against the index of NCBI's database of Archaeal and Bacterial RefSeq Genomes  
303 ([ftp://ftp.ccb.jhu.edu/pub/infphilo/centrifuge/data/p\\_compressed\\_2018\\_4\\_15.tar.gz](ftp://ftp.ccb.jhu.edu/pub/infphilo/centrifuge/data/p_compressed_2018_4_15.tar.gz)) using *Centrifuge*  
304 v.1.0.4 (Kim *et al.*, 2016). We used *Pavian* (Breitwieser & Salzberg, 2019) to summarize results from  
305 *Centrifuge*. To quantify *Wolbachia* infection level in each individual we calculated the number of reads  
306 mapping to a single (most common) *Wolbachia* strain as a fraction of the total reads mapped to any  
307 bacterial or archaeal genome. Previous predictions of *Wolbachia* infection status based on short read  
308 data from whole genome shotgun libraries have been highly successful (Richardson *et al.*, 2012;  
309 98.8% concordant with PCR-based results). Additionally, Illumina read depth have been shown to be  
310 a reliable proxy for *Wolbachia* titre, showing strong correlation with copy number estimated from  
311 quantitative PCR (Early & Clark, 2013) . Differences in proportions of infected individuals between  
312 localities were determined using a Fisher's Exact test with Bonferroni adjustment for multiple  
313 comparisons using base R v3.6.2.

314

### 315 ***Generating ddRADseq SNPs for Wolbachia***

316 In order to generate *Wolbachia* genotypes for the subset of infected individuals we used *seqtk* 1.3-  
317 r106 (<https://github.com/lh3/seqtk>) to retain only reads tagged by *Centrifuge* as mapping to the most  
318 common *Wolbachia* taxon (endosymbiont of *Drosophila simulans*, *wNo*; NCBI txid: 77038). This set of  
319 filtered reads for the infected individuals was processed through the same final Stacks 2.4 pipeline as  
320 above (except the initial run of *process\_tags.pl*) with parameters *m:4-M:4-n:4* and excluding  
321 genotypes with allele frequencies of < 0.05, a maximum observed heterozygosity > 0.65. Additionally,  
322 the SNPs had to present in at least 50% of individuals predicted as infected (*r*-50) in at least half of  
323 the locations harbouring infected individuals (*p*-3). This resulted in 124 loci, 86 of which were

324 monomorphic. BLAST searches revealed that 117 of the 124 loci were 100% identical to at least one  
325 *Wolbachia* genome assembly from NCBI, and a further 5 were  $\geq 98.5\%$  identical to *Wolbachia*  
326 sequences in NCBI Genbank. BLAST searches against NCBI GenBank further showed that the  
327 remaining 2 loci best matched *Wolbachia* sequences but identities were low (94.7% and 92.6%);  
328 however, these loci harboured no variants and hence were not used in any downstream analyses.  
329 The closest matching *Wolbachia* genomes for all loci were from supergroup B strains and 115 of the  
330 124 loci could be assigned to a *Wolbachia* protein with sequence identities of  $\geq 95\%$ . Matching loci  
331 were mostly housekeeping genes and showed an enrichment for hypothetical proteins. Loci carrying  
332 SNPs (38) were further filtered to remove any loci with  $>5$  SNPs and we then generated two SNP  
333 marker datasets for downstream analysis, one in which individuals with  $>50\%$  missing data were  
334 removed and another that included all individuals.

335

### 336 ***Testing association between Wolbachia strains and mitotypes***

337 To assess the congruence between *Wolbachia* genotypes and *P. icarus* mitochondrial haplotypes, we  
338 independently clustered CO1 sequences of infected individuals and concatenated SNPs from  
339 *Wolbachia* genotypes derived from the Stacks pipeline (two datasets: one with  $>50\%$  missing data  
340 individual exclusion criteria and the other without). Both sets of data were clustered independently  
341 using bitwise distance (or Hamming's distance) with UPGMA and 1000 bootstrap replicates for  
342 support using the R package poppr v.2.8.3 (Kamvar *et al.*, 2014) and clustering dendograms were  
343 visualized and annotated using the R package ggtree v.1.17.4

344

### 345 ***Identifying sex-Linked loci to Investigate Wolbachia Induced feminization***

346 To investigate potential feminization in *Wolbachia* infected females we sought to identify sex-linked  
347 SNPs to establish the genetic sex for each individual. Butterflies generally possess a chromosomal  
348 ZW/ZZ sex determination mechanism where females are the heterogametic (ZW or ZO) sex (Traut,  
349 Sahara, & Marec, 2007). Hence, female-specific sex markers (loci polymorphic in females but  
350 homozygous in males), assuming partial homology between Z and W chromosomes, should help to  
351 determine the genetic sex of an individual butterfly: discordance between genetic and morphological  
352 sex of infected females would be consistent with physiological feminization. To identify female-specific

353 sex markers we first fitted a baseline generalized linear model (using a logit link function) with  
354 morphological sex as the dependent variable and PC1 and PC2 from the PCA of SNPs as the  
355 independent variables. We then fitted an additional model by adding a single SNP marker as an  
356 additional independent variable and iterated this for all SNPs in the dataset. A significant association  
357 between a SNP marker and morphological sex was determined by performing a likelihood ratio test of  
358 the baseline model and the baseline model with the added SNP term and using a strict Bonferroni  
359 corrected 5% type I error rate. Significant markers were further excluded if they had more than 2  
360 genotypic classes, were not homozygous for males or happened to be a single SNP from a RAD  
361 locus harbouring multiple SNPs. Generalized linear models and likelihood ratio tests were performed  
362 using the *glm()* and *anova()* functions in base R v3.6.2.

363

## 364 **Results**

### 365 ***Geographic distribution of CO1 haplogroups in Europe and the British Isles***

366 An UPGMA clustering of 585 CO1 sequences (Figure S4) identified the same five main  
367 haplogroups as identified by Dincă *et al.* (2011). Specimens belonging to these five groups are  
368 highlighted in a TCS haplotype network (Figure 1A) with the Crete lineage (red) being the most  
369 divergent haplogroup. The Sierra Nevada lineage (yellow) was limited to this geographic region but a  
370 second specimen, differentiated by two mutations, has been found in Austria (Figure 1B). The second  
371 lineage (Alicante-Provence, purple) limited to Iberia and France according to Dincă *et al.* (2011), was  
372 also found in Norway, Germany and the British Isles. Most specimens from Southern-Western Europe  
373 belong to a different haplogroup (Iberian-Italian lineage, orange in Figure 1) compared to most  
374 specimens from Central-Eastern Europe and the Middle East (Palaeartic group, green in Figure 1).

375 When data for islands and their closest mainland (or larger island) is available, islands always showed  
376 higher incidence of haplogroups identified as having expanded from refugia early in the Holocene by  
377 Dincă *et al.* (2011). Moreover, in central Europe, which is almost completely inhabited by the  
378 Palaeartic haplogroup (green) some, possibly relict, haplogroups occur (arrows in Figure 1B).

379 Samples from the British Isles did not belong to a single haplogroup (black sectors in Figure 1A), but  
380 exhibited strong geographic clustering (Figure 1B, magnified in Figure S5). Those from the Outer

381 Hebrides together with some from the adjacent Scottish mainland were part of the Alicante-Provence  
382 lineage. Those from southwestern and southern parts of the British mainland and Wales were part of  
383 the main Palaeartic group, whilst those from central and northern parts of mainland Britain were part  
384 of the Iberian-Italian lineage.

385

### 386 ***Population structure of British Isles *P. icarus* using genome-wide ddRADseq SNPs***

387 The first component, accounting for 6.8% of the variation and which potentially corresponds to  
388 latitude, separates the northern Scottish samples (BER, TUL, MLG, DGC, and OBN) from all the  
389 southern, southwestern and Welsh samples (Figure 2A). Individuals from RHD (northern England)  
390 and RVS (southern Scotland) samples fell between these extremes along the first component.  
391 Surprisingly, the FRN (French) samples also fell in between the extremes of PC1. The second  
392 component, accounting for 1.7% of the variation, distinguishes the Outer Hebrides (BER, TUL) from  
393 the northern Scottish mainland locations (MLG, DGC, OBN) (Figure 2A).

394 Results of the PCA were largely invariant to missingness or marker number. PCA analyses of the  
395 ddRADseq SNP data filtered for individuals with either >25% (*p15r50miss25*) or >50%  
396 (*p15r50miss50*) missing data and with the dataset filtered for 25% missing data (*p15r50miss25*) but  
397 using unlinked SNPs all produced virtually identical results (Figure 2A and Figure S6A-B). Datasets  
398 with smaller number of markers based on more stringent inclusion criteria (datasets *p15r60miss25*  
399 and *p15r70miss25*) also yielded similar results but the signal decayed with decreasing number of  
400 markers (Figure S6C-D).

401 Next, we partitioned *p15r50miss25* into outlier and putatively neutral loci to disentangle population  
402 structure arising potentially from natural selection *versus* that from historical demographic processes.

403 Together the two outlier detection methods recovered 104 SNPs (Bayescan: 103, OutFLANK: 10)  
404 across 84 ddRADseq loci. These 84 loci including all SNPs (even those not deemed as outliers) were  
405 further filtered to produce set of putatively neutral SNPs from the *p15r50miss25* data set. This  
406 putatively neutral SNP dataset had 5387 SNPs across 2740 loci for 148 individuals and was, unless  
407 otherwise stated, the primary SNPs data set for the genomic analyses that follow. Population  
408 structure based on PCA of the neutral SNPs (Figure 2B) recovers the same topology as that using the

409 full set of SNPs (Figure 2A), except the variation explained by PC1 is reduced to 5.7%. However, the  
410 PCA for outlier SNPs (Figure 2C) only exhibits clustering between English/Welsh and Scottish  
411 samples, with RVS, RHD, and FRN again falling in between the two extremes. PC1 explains 34.1 %  
412 of the variation in the outlier SNP dataset, while PC2 explains 4.3%, although no obvious stratification  
413 is apparent in the second component. To better understand the variation in the outlier SNPs between  
414 the northern and southern clusters in the PCA (Figures 2A-C), we plotted the frequency of the most  
415 common allele (MCA) for all 104 outlier SNPs (Figure 2D). In general, northern populations showed  
416 higher frequencies and mostly fixation of the MCA compared to southern populations.

417 There was significant structuring based on neutral Pairwise  $F_{st}$  values among locations, across the  
418 British Isles, other than those in south (Figure S7A). Pairwise  $F_{st}$  values for neutral markers between  
419 northern Scottish and all southern populations suggest moderate levels of differentiation (0.075-0.109;  
420 Figure S7A), while those between Outer Hebrides and the northern Scottish mainland locations  
421 suggest small, yet significant, levels of differentiation (0.047-0.064, Figure S7A). Differences in  
422 Pairwise  $F_{st}$  values based on outlier SNPs *versus* those on neutral markers (Figures S7A-B mirrored  
423 the differences in the PCAs for neutral and outlier markers (Figures 2B-C). Pairwise  $F_{st}$  values for  
424 outlier SNPs were extremely high between northern Scottish and southern populations (0.385-0.563  
425 Figure S7B).

426 Analysis of shared genetic co-ancestry using fineRADstructure also presents clustering of individuals  
427 (Figure S8) qualitatively similar to those from the PCA of entire and neutral markers only data sets.  
428 The resulting clustered co-ancestry matrix (Figure S8) revealed three distinct clusters consisting of  
429 the (i) northern Scottish samples, (ii) southern and central Great British samples, and (iii) the 6  
430 individuals from southern France. There was evidence of further substructure in the northern Scottish  
431 population with the Outer Hebrides (BER, TUL) samples forming their own distinct sub-cluster within  
432 the northern Scottish cluster (Figure S8). Individuals from RVS and RHD clustered together with the  
433 French population sharing genetic ancestry with both the northern mainland Scottish and southern  
434 British populations.

435

436

437

#### 438 **Concordance between mtDNA and Genomic Markers**

439 If the British Isles had been populated by three discrete colonization and establishment events, as  
440 implied by the geographic structuring of mtDNA haplogroups in the British Isles (Figure 1, Figure S5),  
441 we would expect strong concordance between mtDNA and genomic markers. Some association is  
442 evident between mtDNA and genomic markers (Figure 2A-C) and we evaluated this relationship in an  
443 AMOVA framework. The association of mtDNA haplogroups with genomic variation was weak (4.8%)  
444 but significant ( $p$ -value < 0.0001) while genomic divergence within the haplogroups was stronger  
445 (15.6%,  $p$ -value < 0.0001).

446

#### 447 **Prediction of *Wolbachia* infection**

448 Using Centrifuge to match all demultiplexed reads (for all 190 individuals) to NCBI's RefSeq genomes  
449 of archaeal and bacterial genomes, we identified an average 5.07 % (standard deviation:  $\pm 1.96\%$ ) of  
450 the total reads per individual were classified as matching an archaeal or bacterial genome (Table S4)  
451 with most matches being to bacterial genomes ( $5.05 \pm 1.96\%$ ; Table S4). The most frequently  
452 encountered *Wolbachia* genome was identified as an endosymbiont of *Drosophila simulans*, wNo  
453 (NCBI txid: 77038). The total percentage of classified reads with matches to this genome varied by  
454 several orders of magnitude across individuals (min= 0.00036%, max=53.56%, Table S4). There was  
455 no relationship between the total number of raw reads and the percentage of classified reads  
456 mapping to this taxon (*Spearman's rank correlation* = 0.131,  $P$ = 0.07544; Figure S9A). There was a  
457 natural discontinuity in the percentage of classified reads mapping to *Wolbachia* across all individuals  
458 (Figure S9B) and this metric clearly had a bimodal distribution. Using a threshold of  $\log_2$  (percentage  
459 of classified reads mapping to *Wolbachia*) > 0 to classify an individual as infected or not, only  
460 individuals from BER, TUL, DGC, MLG, OBN and one individual from RHD were classified as infected  
461 with infection percentages ranging from 87.5% (14 of 16 individuals), in TUL in the Outer Hebrides, to  
462 8% (1 of 13) in RHD near Durham northern mainland Britain) (Figure 3A). The proportion of infected  
463 populations differed significantly between RHD and all other localities; however, all other pairwise  
464 comparisons were insignificant (Table S5). All females from the Outer Hebrides (BER, TUL) were  
465 infected with a high percentage of classified reads mapping to *Wolbachia* (min=15.6%, max=53.56%;



466 Figure 3B). However, no such dimorphism in number infected or percentage mapped reads was  
467 apparent in the mainland populations (DGC, MLG, OBN; Figure 3B).

468

#### 469 ***Congruence between CO1 mitotypes and Wolbachia strains***

470 To determine association between *Wolbachia* genotypes and CO1 mitotypes, we performed UPGMA  
471 clustering of Hamming's distance for each for CO1 sequences (derived from of a subset of 38 infected  
472 individuals where sequence information was available) and *Wolbachia* ddRADseq SNPS (derived  
473 from all 55 infected individuals). For CO1 sequences we recovered two clusters with strong support,  
474 corresponding to the Alicante-Sierra Nevada and Iberia-Italy CO1 haplogroups (Figure 4). The  
475 Alicante-Sierra Nevada cluster was composed entirely of individuals from the Outer Hebrides except  
476 for three individuals from the nearby western coast of mainland Scotland (MLGm002, MLGf010, &  
477 OBNm110; Figure 4). UPGMA clustering of Hamming's distance between concatenated SNPs  
478 derived from the *Wolbachia* genotypes dataset with and without the >50% missing data exclusion  
479 criteria were near identical, only the latter is shown (Figure 4). Clustering of *Wolbachia* SNPs also  
480 recovered two strongly supported clusters, corresponding to strain *w*ca1 (Outer Hebrides) and *w*ca2  
481 (mainland). The three individuals from the mainland (MLGm002, MLGf010, & OBNm110) possessing  
482 the Alicante-Sierra Nevada haplotype also carried the *w*ca1 strains. There is perfect association  
483 between individuals bearing *Wolbachia* strain *w*ca1 and the Alicante-Sierra Nevada CO1 haplotype  
484 and *Wolbachia* strain *w*ca2 and the Italy-Iberia CO1 haplotype (although not all individuals with this  
485 haplotype are infected by *Wolbachia*) regardless of geographical locality.

486

#### 487 ***Sex-specific markers and feminization in Outer Hebrides***

488 *Wolbachia* dosage can influence phenotypic outcomes in the host (Arai, Lin, Nakai, Kunimi, & Inoue,  
489 2020; Breeuwer & Werren, 1993), thus the high levels of *w*ca1 observed in females of the Outer  
490 Hebrides population could be indicative of *Wolbachia* induced feminization. In this scenario,  
491 morphological males should all be homozygous and morphological females should be heterozygous  
492 for female-specific markers (homozygous for Z but a novel allele for W chromosome). Discordance  
493 between the latter would suggest potential feminization of males. We used a combination of  
494 association analysis and filtering to identify such a set of 10 putatively female-specific SNPs (Table

495 S6) across 7 RAD loci. Strikingly 5 out of 10 SNPs (across 3 RAD loci) showed perfect discordance of  
496 morphological sex with genetic sex except for females carrying the *wlca1* strain (Figure 5). The  
497 additional 5 SNPs also show complete discordance for morphological and genetic sex for *wlca1*  
498 infected females but also includes a small number of homozygote of females from uninfected or *wlca2*  
499 carrying individuals (Table S6).

500

## 501 **Discussion**

502 In this study we used mtDNA and ddRADseq data to describe the genetic variability and structure of  
503 *P. icarus* within the British Isles and additionally to determine the historical processes underlying this  
504 contemporary genetic structure. We found strong geographical structuring in both mtDNA and the  
505 nuclear genome. However, there was only weak concordance between mtDNA and genomic variation  
506 at the nuclear level, suggesting the potential for partially independent evolutionary trajectories for the  
507 mitochondrial and nuclear genomes. Our results suggest that recurrent *Wolbachia*-mediated mtDNA  
508 sweeps can strongly contribute to the sorting of mtDNA haplogroups in the British Isles (and  
509 potentially in Europe). Moreover, co-ancestry of genomic clusters within the British Isles and the  
510 putative out-group samples from France raises the possibility of a distinct two-phase colonization that  
511 merits further investigation. Finally, we also present some preliminary evidence for potential  
512 *Wolbachia*-mediated feminization in an isolated population in the Outer Hebrides.

513

### 514 ***Evidence for multiple mtDNA sweeps across Europe and the British Isles.***

515 Using mitochondrial *CO1* and the nuclear gene *ITS-1*, Dincă *et al.* (2011) identified five lineages with  
516 geographic structuring in southern Europe. Using the observed distribution of lineages and inferred  
517 divergence time, ranging from 1.8 mya to 0.5 mya, Dincă *et al.* (2011) reconstructed and dated to the  
518 Pleistocene a series of divergence and dispersal events followed by genetic sweeps which could have  
519 potentially produced the observed genetic structuring. The reconstruction predicted that Iberian and  
520 Crete lineages diverged in these areas around 1.8 mya ago, followed by the separation of an early  
521 Iberian lineage (1.2 mya) into the Sierra Nevada and the Alicante-Provence lineages. They would  
522 have then been replaced in most of the Iberian Peninsula by the Iberia-Italy haplogroup (500 kya), in

523 turn replaced over central Europe by the Palaeartic one in the upper Pleistocene. By extending the  
524 geographical sampling to Northern Europe, we provide further evidence for the occurrence of similar  
525 waves of colonization also over the formerly glaciated areas of Europe. In fact, the pattern showing  
526 the more ancient colonizer appearing as a relict in the southern-most Mediterranean areas is  
527 completely reversed in Northern Europe, where the supposed ancient colonizer is limited to northern-  
528 most and marginal areas. The wider distribution of haplogroups on European islands is consistent  
529 with multiple waves of colonisation with recent evidence from islands and neighbouring mainland  
530 areas indicating that islands have a higher proportion of mitotypes from supposed earlier colonization  
531 events (based on dating from Dincă *et al.* (2011)). Finally, relict mitotypes occur throughout areas of  
532 central Europe representing potential invasion sequences, including the occurrence in Austria of a  
533 specimen of the Sierra Nevada haplogroup previously supposed to have evolved in southern Spain  
534 and possibly representing the first colonization wave.

535 Over the British Isles the three haplogroups also show a clear geographic stratification with the  
536 Alicante-Provence haplogroup restricted to the Outer Hebrides (with a single sample from  
537 northwestern Ireland); the northern mainland occupied by the Iberia-Italy haplogroup; and the  
538 southern English and Welsh populations being largely composed of the Palaeartic haplogroup.  
539 Additionally, the Alicante-Provence and Iberia-Italy haplogroups present in the British Isles are  
540 perfectly endemic (Figure 1A), whereas the Palaeartic haplogroup present in the British Isles are a  
541 sub-sample of the continental European mitotypes. This incomplete lineage sorting of Palaeartic  
542 mitotypes in the British Isles could be indicative of a more recent invasion. The persistence and  
543 structuring of Alicante-Provence and Iberia-Italy on the other hand could be explained by our finding  
544 of mitotype-specific *Wolbachia* association within the British Isles ([further discussed below](#)).

545 Our mtDNA data demonstrates all the main lineages except the Cretan one occur in the areas  
546 covered by ice sheets at the time of the Last Glacial Maximum (22 kya) which imposes a relatively  
547 short time limit to the waves of dispersal to northern Europe and the British Isles. The earliest time  
548 period that *P. icarus* could have occurred within the British Isles is c. 13 kya following rapid warming  
549 at the end of the Last Glacial Maximum. Most dating of insects arriving to British islands and  
550 persisting now are between the end of the Younger Dryas (11.8 kya) and the severance of the British  
551 Isles from mainland Europe by a permanent sea-strait c. 8 kya. Again, the islands currently  
552 showing genetic contrasts from adjacent mainland areas (Levant, Belle-Ile-en-Mer, some Tuscan

553 islands, Hebrides, Ireland) were connected to the mainland in the Last Glacial Maximum, but for the  
554 northerly islands connections would mostly have been available during the period when both climate  
555 and vegetation was tundra. Thus, the sequential invasions would have occurred in the interglacial  
556 when the sea barriers were re-established and hampered genetic sweeps (Dapporto & Bruschini,  
557 2012).

558

### 559 ***Distinct genomic clusters within the British Isles***

560 Adults of *P. icarus* are described as relatively mobile (Asher *et al.*, 2001; Cowley *et al.*, 2001) and  
561 early work at the European scale using allozymes revealed little genetic differentiation over mainland  
562 Europe, and no geographic regionalisation, although samples from the British Isles exhibited lower  
563 allelic diversity than in mainland Europe (de Keyser *et al.*, 2012). Our data contrasts with this broad  
564 finding, demonstrating a pattern of geographic variation even over the smaller spatial scale of British  
565 Isles. Population structure and demographic inference based on putatively neutral genomic markers  
566 reveal substantial differentiation between northern (mostly Scottish) and southern populations (Figure  
567 2B). There is further subdivision between the Outer Hebrides Islands and the mainland in Northern  
568 Scotland. The latter substructure in northern Scotland is relatively weak (1.7% compared to 5.6% in  
569 PCA between northern and southern populations) and could be a direct result of the geographical  
570 isolation of Outer Hebridean populations but could, theoretically, also result from *Wolbachia*-mediated  
571 bidirectional cytoplasmic incompatibility (see below).

572 There is stronger divergence between northern (Outer Hebridian plus Scottish Highlands) and  
573 southern (Central/Southern England and Wales) populations for both neutral and outlier markers  
574 (Figure 2B and C). Outlier loci detected based on tests for directional selection are often hypothesized  
575 to be loci involved in local adaptation and it is possibly that these markers may reflect or be linked to  
576 markers adapted to regional environmental conditions. However, the significance of this divergence,  
577 presumably resulting from both neutral demographic processes and directional selection, is not  
578 entirely obvious. There is evidence of switch from bivoltine life history to a univoltine life history along  
579 the Scottish-English borders (de Keyser, 2012) that could act as a barrier to gene flow but there is still  
580 overlap of flight period among reproductive adults (Matechou, Dennis, Freeman, & Brereton, 2014).  
581 However, an *in situ* barrier to gene flow does not explain the complete absence of genetic structure

582 (Figures 2A-C, Figure S7-8) in southern locations compared to those in the north, and the high level  
583 of heterozygosity in outlier loci (Figure 2D) observed in this cluster.

584 An additional surprising observation was the relationship of the south-central French (FRN) samples  
585 to the northern and southern British clusters. The FRN samples were selected as a reference out-  
586 group that would be expected to be ancestral to all populations in the British Isles, under a model of a  
587 single colonization event. However, both the PCA analyses (Figure 2) and the fineRadStructure co-  
588 ancestry analyses (Figure S8) place the FRN samples as intermediate to northern and southern  
589 populations. Such an observation could result from an admixture in southern France. However,  
590 another possibility is that the northern and southern clusters in the British Isles results from two  
591 independent invasion and expansions events from an ancestor of the contemporary FRN population.  
592 This scenario would also imply that the southern British cluster results from the admixture of two  
593 different colonization sources, which would be consistent with the lack of genetic structure and higher  
594 heterozygosity of outlier loci (isolate breaking) in this population. This hypothesis requires further  
595 corroboration by a wider sampling of European specimens to infer potential ancestral populations.

596

### 597 ***Impact of Wolbachia infection on demographic inference in the British Isles***

598 Past and contemporary *Wolbachia* sweeps can confound reconstruction of phylogeographic  
599 dynamics for arthropods based upon mtDNA alone (Galtier *et al.*, 2009; Hurst & Jiggins, 2005). Within  
600 the British Isles, populations in the north harboured a large proportion (>50% in all cases) of infected  
601 individuals, whereas no predictions of infection were made for individuals in the south suggesting that  
602 individuals in the south are not infected or infection levels are much lower. We found evidence for two  
603 distinct *Wolbachia* strains, *wlca1* and *wlca2*, that show perfect association with the Alicante-Provence  
604 and Italy-Iberia haplogroups, respectively. Such genetic structuring of *Wolbachia* could potentially  
605 explain the persistence of these early colonising haplogroups of the host butterfly under male-biased  
606 dispersal and CI (Hurst & Jiggins, 2005) between infected males and uninfected females (and  
607 between males and females infected with different strains). Firstly, this could account for the  
608 observation that intermediate individuals in southern Scotland/northern England (RVS, RHD) and  
609 several southern populations (CFW, MDS, MMS, BMW) harbour the Iberian-Italian haplogroup. We  
610 detected *Wolbachia* infection (albeit as a single case) as far south as northern England (RHD).

611 Second, bidirectional CI between *wlca1* and *wlca2* individuals coupled with imperfect vertical  
612 transmission could promote stable coexistence of both strains (Telschow, Yamamura, & Werren,  
613 2005) which could account for the persistence of the relict haplogroup in the Outer Hebrides. We did  
614 not detect any double-infected individuals (i.e., those carrying both strains), which would be consistent  
615 with bidirectional CI. However, it remains possible that are our sequencing data are not sensitive  
616 enough to detect double infections.

617 Existence of *Wolbachia*-mediated mtDNA sweeps in the British Isles also raise the possibility of their  
618 influence on mtDNA phylogeography in continental Europe. Recent CO1 analyses reveal that many  
619 butterfly species exhibit diverse and complex mtDNA genealogies across Eurasia (Dincă *et al.*, 2015).  
620 However, more comprehensive genomic analysis, that have only recently become available, show  
621 that differentiation in the nuclear genome is not always concordant with mtDNA variation (Dincă, Lee,  
622 Vila, & Mutanen, 2019; Hinojosa *et al.*, 2019; Tóth *et al.*, 2017) and the observed mito-nuclear  
623 discordance could be explained may be past or contemporary *Wolbachia* infections (Després, 2019;  
624 Gaunet *et al.*, 2019). A systematic survey of infections on continental Europe (e.g. Sucháčková  
625 Bartoňová *et al.*, 2021) and divergence dating of *Wolbachia* strains, could offer more conclusive  
626 insight into the impact of *Wolbachia* on genetic structuring in *P. icarus*. However, *Wolbachia* infections  
627 show high turnover (Bailly-Bechet *et al.*, 2017) and determining the influence of past infections on  
628 host biogeography remains challenging.

629

### 630 ***Evidence for a sequential colonization of the British Isles***

631 Our mtDNA analysis was suggestive of three independent colonisations of the British Isles. We also  
632 detected three clusters based on our genomic data (Figure 2A-B) but there is only weak association  
633 between mtDNA haplogroups and genomic variation (AMOVA, 4.8%). However, we argue, that some  
634 of our observations are consistent with a scenario of two discrete colonization events. Most  
635 suggestive of these is the relationship of the French samples to northern and southern British  
636 genomic clusters as discussed above. The placement of these samples along the PCA (Figure 2A-B)  
637 and the co-ancestry matrix (Figure S8) suggest that the northern and southern British clusters are  
638 independent expansions most likely from an ancestor of the French population. The high  
639 heterozygosity and lack of genetic structure in the southern population could result from an admixture

640 of a resident and a second recolonizing population. The second source population could be from a  
641 central European refugium, potentially representing the recent Palaeartic lineage expansion as  
642 reconstructed by Dincă *et al.* (2011). Despite the weak concordance between mtDNA and genomic  
643 data, most of the southern British populations consist largely of the Palearctic mtDNA haplogroup and  
644 the spread of mtDNA (but not nuclear DNA) further north could be retarded by cytoplasmic  
645 incompatibility with *Wolbachia* infected Italy-Iberia individuals.

646 On a time-line the possibility for this phased invasion of the British Isles since the Last Glacial  
647 Maximum is from some time after 18 kya to c. 12.9 kya and then again from c. 11.7 kya to c. 8 kya  
648 (after the Younger Dryas and before complete isolation from the continental mainland). During the  
649 glacial re-advance of the Younger Dryas (~12.9-11.7 kya) *P. icarus* may have possibly persisted in a  
650 few refugial areas on south facing slopes in southern England. The Alicante-Provence and Iberia-Italy  
651 haplotypes likely entered the British Isles during, or before, this late cold-period. These potentially  
652 cold-adapted populations may have expanded northwards as the ice sheet retreated c. 11.7 while  
653 allowing for another recolonization (Palearctic haplotype) from continental Europe up until c. 8 kya  
654 when all land bridges were inundated. Contemporary populations on the Outer Hebrides are much  
655 better suited to flight at lower temperatures than southern populations on the British mainland (Howe  
656 *et al.*, 2007). Additionally, the two-stage colonization hypothesis would imply that the colonization of  
657 Ireland likely occurred during the first colonization period before the separation of Ireland and  
658 mainland Britain c. 15 kya. Indeed mtDNA of individuals from Ireland harbour the same Alicante-  
659 Provence and Iberia-Italy mitotypes found in northern England and Scotland. This scenario has a  
660 direct and testable implication: genomes of Irish individuals should also cluster more closely with the  
661 northern British genomic cluster and could potentially be obtained in the future.

662 Although past climate events do support the idea of multiple invasion sequences for some butterfly  
663 species (Dennis, 1977), there is little direct genetic evidence for extant butterfly species of the British  
664 Isles to be the result of multiple distinct colonizations. Previous work on the mitochondrial genetic  
665 structuring of *Coenonympha tullia* has been suggested to indicate the possibility of two separate  
666 colonization events (Joyce *et al.*, 2009), although this study did not include any continental samples  
667 and could also not make any strong inferences on routes of post-glacial colonization. The occurrence  
668 of distinct mitotypes of *Euphydryas aurinia* in the north and south of the British Isles have also been  
669 suggested to support a double colonization (Joyce & Pullin, 2001). However, in both cases (Joyce et

670 al., 2009; Joyce & Pullin, 2001), low levels of nuclear variation, based on allozymes or a few nuclear  
671 markers, do not unequivocally support a hypothesis of two discrete colonization events. Notably,  
672 karyotype, mtDNA and nuclear DNA markers from several small mammals have also been suggested  
673 to support a two-stage colonization as proposed here (Searle *et al.*, 2009). More recent  
674 phylogeographic analysis of the herbaceous perennial *Campanula rotundifolia* strongly suggests the  
675 possibility of two independent colonization events for this species from two distinct European refugium  
676 (Sutherland, Quarles, & Galloway, 2018; Wilson *et al.*, 2020). Interestingly, *C. rotundifolia* exhibits  
677 two clusters, based on cytotype and ploidy level, within the British Isles that segregate between  
678 Ireland and western Britain mainland on one hand and from eastern and southern Britain mainland on  
679 the other.

680 Further corroboration for the possibility of a two-colonisation scenario for *P. icarus* would require  
681 detailed reconstruction of the recent demographic histories of the genomic clusters highlighted in this  
682 study. Dense genomic data, such as that from whole genome sequencing, may be able to provide  
683 demographic inference given the relatively recent ancestry and gene flow between these populations.  
684 Genomic data from Irish individuals would also help either support or refute the hypothesis. Finally,  
685 wider sampling of European populations would also be helpful in determining the number and  
686 potential sources of refugium.

687

#### 688 ***Potential Wolbachia-mediated feminization on the Outer Hebrides***

689 Although, we currently have no evidence for the capability of either *wlca1* or *wlca2* to induce CI, two  
690 observations do indicate a potential phenotypic effect of the *wlca1* strain. Firstly, all females from the  
691 Outer Hebrides were predicted to be infected with *wlca* but not all males, whereas infection status on  
692 the mainland exhibited no such dimorphism. Second, Outer Hebridean morphological females carried  
693 a *Wolbachia* load that was, based on our proxy metric for copy number, an order of magnitude higher  
694 than in morphological males. *Wolbachia* density can be indicative of its phenotypic effect on the host  
695 (Arai *et al.*, 2020; Breeuwer & Werren, 1993). Our observations here are consistent with *Wolbachia*-  
696 induced feminization of genetic males (Stouthamer, Breeuwer, & Hurst, 1999). Such feminization  
697 would predict that female-specific markers in a species with a ZW sex determination system; with the  
698 caveat of partial homology between Z and W chromosomes would yield male (homozygous)



699 genotypes in “feminized” males. As expected, all morphological females carrying the *wlca1* had male  
700 genotypes.

701 Feminization is a well-known reproductive manipulation strategy deployed by *Wolbachia* (Werren,  
702 Baldo, & Clark, 2008), however, it has not been encountered frequently within Lepidoptera (Duplouy &  
703 Hornett, 2018). The best documented instance of feminization in butterflies refers to the discovery of  
704 sex-biased female lines in two species of pierid *Eurema* butterflies in Japan (Kato, 2000). *wFem*  
705 occurs at low frequencies in natural populations of *Eurema* and has not been detected in males. A  
706 causative role of *wFem* in feminization has been suggested by antibiotic treatment of infected larva  
707 which results in intersex individuals (Narita, Kageyama, Nomura, & Fukatsu, 2007) and antibiotic  
708 treatment of adult females leads to all male progeny (Kern, Cook, Kageyama, & Riegler, 2015). The  
709 *wFem* pattern of infection contrasts with that of *wlca1*, where both females and males can be infected,  
710 but females carry a higher bacterial copy number. If *Wolbachia*-induced feminization indeed occurs in  
711 Outer Hebridean *P. icarus*, it will add to the small number of potential model systems to study the  
712 molecular basis underlying this poorly understood process in Lepidoptera. However, more direct  
713 evidence for *wlca1*- induced feminization is required (Hiroki, Kato, Kamito, & Miura, 2002; Kageyama  
714 *et al.*, 2017).

715 The potential existence of feminizing *Wolbachia* and the relative genetic isolation indicated the  
716 distinctiveness of the populations on the Outer Hebrides. Because of the current geographic isolation,  
717 we suggest that the populations on the Outer Hebrides represent a distinct genetic and ecological  
718 evolutionary unit that warrants consideration as being of conservation interest and monitoring. The  
719 eco-evolutionary dynamics of this *Wolbachia*-host system and their impact on past and future biology  
720 of these butterflies warrants further investigation.

721

## 722 **Conclusions**

723 The contemporary population structure and phylogeography of the flora and fauna of the British Isles  
724 has directly resulted from the events following the last glacial period (Hewitt, 1999; Provan & Bennett,  
725 2008). This paradigm of “southern richness and northern purity” implies limited intraspecific diversity  
726 and genetic structure in northern areas. Using mtDNA and ddRADseq data for *P. icarus* butterflies in  
727 the British Isles, we provide evidence for substantial and unexpected levels of genetic structuring and

728 variability across a fine-scale spatial resolution. Geographic structuring of nuclear genomic variation  
729 and mtDNA variation was only weakly concordant and we argue that this pattern could be explained  
730 by multiple *Wolbachia*-mediated mtDNA sweeps and potentially two or three discrete colonization  
731 events of the British Isles before and after the glacial re-advance of the Younger Dryas c. 13 kya. We  
732 consider this a strong hypothesis that requires further corroboration and there may yet be alternative  
733 explanations for the genomic structuring observed within mainland Britain. It should be noted that  
734 several butterfly species in the British Isles exist as distinct geographical and/or genetic populations  
735 along a north-south divide and a case for multiple colonisations has been advanced on at least two  
736 occasions (Joyce et al., 2009; Joyce & Pullin, 2001) and there is also some evidence for two distinct  
737 colonization events in other flora and fauna (Searle *et al.*, 2009; Wilson *et al.*, 2020). The current  
738 dearth of high resolution genomic data for the flora and fauna restricts any evaluation of the generality  
739 or plausibility of the sequential colonization hypothesis. However, with initiatives to provide high-  
740 quality genomes of all British flora and fauna (darwintreeoflife.org) and continued dropping costs of  
741 sequencing we may see a renewed interest and rigour in the phylogeographic reconstruction of the  
742 British Isles and beyond.

743

## 744 **Acknowledgements**

745 This work was funded by Oxford Brookes University, Oxford, UK including a start-up fund to Saad  
746 Arif. LD is supported by the project funded by the Tuscan Archipelago National Park "Ricerca e  
747 conservazione sugli Impollinatori dell'Arcipelago Toscano e divulgazione sui Lepidotteri del parco".  
748 We thank the late Bruce J. Riddoch for help collecting samples. We would like to thank the following  
749 for permissions to sample on their land: Mark Dinning and the Durham Wildlife Trust, Paul Nunns at  
750 the UK Forestry Commission, Alastair Gardner and Jenny Loring at Natural England, Simone Bullion  
751 and the Suffolk Wildlife Trust, and Simeon LD Jones and the Carmarthenshire County Council. This  
752 manuscript is dedicated to the memory of our dearly departed colleague: Bruce J Riddoch.

753

754

755

## 756 **Author Contributions**

757 S.A., T.G.S and L.D. designed the study and conducted preliminary analysis. S.A., T.G.S, M.D.S.N  
758 and W.H.H-M performed all fieldwork. S.A. performed all laboratory work. S.A., L.D., W.G.H-M., M.G.  
759 and M.D.S.N. performed data analysis. S.A., T.G.S. and L.D. wrote the manuscript with input from all  
760 authors.

761

## 762 **References**

- 763 Allendorf, F. W., Hohenlohe, P. A., & Luikart, G. (2010). Genomics and the future of conservation  
764 genetics. *Nature Reviews Genetics*, *11*(10), 697–709. doi: 10.1038/nrg2844
- 765 Allio, R., Donega, S., Galtier, N., & Nabholz, B. (2017). Large Variation in the Ratio of Mitochondrial to  
766 Nuclear Mutation Rate across Animals: Implications for Genetic Diversity and the Use of  
767 Mitochondrial DNA as a Molecular Marker. *Molecular Biology and Evolution*, *34*(11), 2762–2772. doi:  
768 10.1093/molbev/msx197
- 769 Arai, H., Lin, S. R., Nakai, M., Kunimi, Y., & Inoue, M. N. (2020). Closely Related Male-Killing and  
770 Nonmale-Killing Wolbachia Strains in the Oriental Tea Tortrix *Homona magnanima*. *Microbial  
771 Ecology*, *79*(4), 1011–1020. doi: 10.1007/s00248-019-01469-6
- 772 Asher, J., Warren, M., Fox, R., Harding, P., Jeffcoate, G., & Jeffcoate, S. (2001). *Millennium Atlas of  
773 Butterflies in Britain and Ireland* (1st ed.). Oxford, UK: Oxford Univeristy Press.
- 774 Atkinson, T. C., Briffa, K. R., & Coope, G. R. (1987). Seasonal temperatures in Britain during the past  
775 22,000 years, reconstructed using beetle remains. *Nature*, *325*(6105), 587–592. doi:  
776 10.1038/325587a0
- 777 Bailly-Bechet, M., Martins-Simões, P., Szöllősi, G. J., Mialdea, G., Sagot, M.-F., & Charlat, S. (2017).  
778 How Long Does Wolbachia Remain on Board? *Molecular Biology and Evolution*, *34*(5), 1183–1193.  
779 doi: 10.1093/molbev/msx073
- 780 Breeuwer, J. A., & Werren, J. H. (1993). Cytoplasmic incompatibility and bacterial density in *Nasonia  
781 vitripennis*. *Genetics*, *135*(2), 565–574.
- 782 Breitwieser, F. P., & Salzberg, S. L. (2019). Pavian: Interactive analysis of metagenomics data for  
783 microbiome studies and pathogen identification. *Bioinformatics*, *36*(4), 1303–1304. doi:  
784 10.1093/bioinformatics/btz715
- 785 Brucker, R. M., & Bordenstein, S. R. (2012). Speciation by symbiosis. *Trends in Ecology & Evolution*,  
786 *27*(8), 443–451. doi: 10.1016/j.tree.2012.03.011
- 787 Catchen, J., Hohenlohe, P. A., Bassham, S., Amores, A., & Cresko, W. A. (2013). Stacks: An analysis  
788 tool set for population genomics. *Molecular Ecology*, *22*(11), 3124–3140. doi: 10.1111/mec.12354

- 789 Cesaroni, D., Lucarelli, M., Allori, P., Russo, F., & Sbordoni, V. (1994). Patterns of evolution and  
790 multidimensional systematics in graylings (Lepidoptera: Hipparchia). *Biological Journal of the*  
791 *Linnean Society*, 52(2), 101–119. doi: 10.1111/j.1095-8312.1994.tb00982.x
- 792 Charlesworth, B. (2009). Effective population size and patterns of molecular evolution and variation.  
793 *Nature Reviews Genetics*, 10(3), 195–205. doi: 10.1038/nrg2526
- 794 Clement, M., Posada, D., & Crandall, K. A. (2000). TCS: A computer program to estimate gene  
795 genealogies. *Molecular Ecology*, 9(10), 1657–1659. doi: 10.1046/j.1365-294x.2000.01020.x
- 796 Coard, R., & Chamberlain, A. T. (2016). The nature and timing of faunal change in the British Isles  
797 across the Pleistocene/Holocene transition: *The Holocene*. (Sage CA: Thousand Oaks, CA). doi:  
798 10.1191/095968399672435429
- 799 Cowley, M. J. R., Thomas, C. D., Roy, D. B., Wilson, R. J., León-Cortés, J. L., Gutiérrez, D., ... Gaston, K.  
800 J. (2001). Density–distribution relationships in British butterflies. I. The effect of mobility and spatial  
801 scale. *Journal of Animal Ecology*, 70(3), 410–425. doi: 10.1046/j.1365-2656.2001.00508.x
- 802 Danecek, P., Auton, A., Abecasis, G., Albers, C. A., Banks, E., DePristo, M. A., ... 1000 Genomes Project  
803 Analysis Group. (2011). The variant call format and VCFtools. *Bioinformatics*, 27(15), 2156–2158. doi:  
804 10.1093/bioinformatics/btr330
- 805 Dapporto, L., & Bruschini, C. (2012). Invading a refugium: Post glacial replacement of the ancestral  
806 lineage of a Nymphalid butterfly in the West Mediterranean. *Organisms Diversity & Evolution*, 12(1),  
807 39–49. doi: 10.1007/s13127-011-0065-z
- 808 Dapporto, L., Bruschini, C., Dincă, V., Vila, R., & Dennis, R. L. H. (2012). Identifying zones of phenetic  
809 compression in West Mediterranean butterflies (Satyrinae): Refugia, invasion and hybridization.  
810 *Diversity and Distributions*, 18(11), 1066–1076. doi: 10.1111/j.1472-4642.2012.00903.x
- 811 Dapporto, L., Cini, A., Menchetti, M., Vodă, R., Bonelli, S., Casacci, L. P., ... Vila, R. (2017). Rise and fall  
812 of island butterfly diversity: Understanding genetic differentiation and extinction in a highly diverse  
813 archipelago. *Diversity and Distributions*, 23(10), 1169–1181. doi: 10.1111/ddi.12610
- 814 Dapporto, L., Cini, A., Vodă, R., Dincă, V., Wiemers, M., Menchetti, M., ... Vila, R. (2019). Integrating  
815 three comprehensive data sets shows that mitochondrial DNA variation is linked to species traits and  
816 paleogeographic events in European butterflies. *Molecular Ecology Resources*, 19(6), 1623–1636.  
817 doi: 10.1111/1755-0998.13059
- 818 de Keyser, R. (2012). *Spatial structuring in trait variation in *Polyommatus icarus* in a functional*  
819 *context*. PhD Thesis. Oxford Brookes University: UK.
- 820 de Keyser, R., Shreeve, T. G., Breuker, C. J., Hails, R. S., & Schmitt, T. (2012). *Polyommatus icarus*  
821 *butterflies in the British Isles: Evidence for a bottleneck*. *Biological Journal of the Linnean Society*,  
822 107(1), 123–136. doi: 10.1111/j.1095-8312.2012.01925.x
- 823 Dennis, R. L. H. (1977). *The British Butterflies: Their Origin and Establishment*,. Faringdon, England: E.  
824 W. Classey.

- 825 Després, L. (2019). One, two or more species? Mitonuclear discordance and species delimitation.  
826 *Molecular Ecology*, 28(17), 3845–3847. doi: <https://doi.org/10.1111/mec.15211>
- 827 Dincă, V., Dapporto, L., Somervuo, P., Vodă, R., Cuvelier, S., Gascoigne-Pees, M., ... Vila, R. (2021).  
828 High resolution DNA barcode library for European butterflies reveals continental patterns of  
829 mitochondrial genetic diversity. *Communications Biology*, 4(1), 1–11. doi: 10.1038/s42003-021-  
830 01834-7
- 831 Dincă, V., Dapporto, L., & Vila, R. (2011). A combined genetic-morphometric analysis unravels the  
832 complex biogeographical history of *Polyommatus icarus* and *Polyommatus celina* Common Blue  
833 butterflies. *Molecular Ecology*, 20(18), 3921–3935. doi: 10.1111/j.1365-294X.2011.05223.x
- 834 Dincă, V., Lee, K. M., Vila, R., & Mutanen, M. (2019). The conundrum of species delimitation: A  
835 genomic perspective on a mitogenetically super-variable butterfly. *Proceedings of the Royal Society*  
836 *B: Biological Sciences*, 286(1911), 20191311. doi: 10.1098/rspb.2019.1311
- 837 Dincă, V., Montagud, S., Talavera, G., Hernández-Roldán, J., Munguira, M. L., García-Barros, E., ...  
838 Vila, R. (2015). DNA barcode reference library for Iberian butterflies enables a continental-scale  
839 preview of potential cryptic diversity. *Scientific Reports*, 5(1), 12395. doi: 10.1038/srep12395
- 840 Dray, S., & Dufour, A.-B. (2007). The ade4 Package: Implementing the Duality Diagram for Ecologists.  
841 *Journal of Statistical Software*, 22(1), 1–20. doi: 10.18637/jss.v022.i04
- 842 Drew, G. C., Frost, C. L., & Hurst, G. D. (2019). Reproductive Parasitism and Positive Fitness Effects of  
843 Heritable Microbes. In *ELS* (pp. 1–8). American Cancer Society. doi:  
844 10.1002/9780470015902.a0028327
- 845 Duploux, A., & Hornett, E. A. (2018). Uncovering the hidden players in Lepidoptera biology: The  
846 heritable microbial endosymbionts. *PeerJ*, 6, e4629. doi: 10.7717/peerj.4629
- 847 Early, A. M., & Clark, A. G. (2013). Monophyly of *Wolbachia pipientis* genomes within *Drosophila*  
848 *melanogaster*: Geographic structuring, titre variation and host effects across five populations.  
849 *Molecular Ecology*, 22(23), 5765–5778. doi: 10.1111/mec.12530
- 850 Edwards, S. V., Potter, S., Schmitt, C. J., Bragg, J. G., & Moritz, C. (2016). Reticulation, divergence, and  
851 the phylogeography–phylogenetics continuum. *Proceedings of the National Academy of Sciences*,  
852 113(29), 8025–8032. doi: 10.1073/pnas.1601066113
- 853 Ehlers, J., Ehlers, J., Gibbard, P. L., & Hughes, P. D. (2011). *Quaternary glaciations—extent and*  
854 *chronology: A closer look (Vol. 15). View on ScienceDirect Quaternary Glaciations—Extent and*  
855 *Chronology, Volume 15*. Elsevier.
- 856 Fiera, C., Habel, J. C., Kunz, M., & Ulrich, W. (2016). Large-scale phylogenetic structure of European  
857 springtails (Collembola) depends on species range size and postglacial colonization history. *Biological*  
858 *Journal of the Linnean Society*, n/a(n/a). doi: 10.1111/bij.12907
- 859 Funk, D. J., & Omland, K. E. (2003). Species-Level Paraphyly and Polyphyly: Frequency, Causes, and  
860 Consequences, with Insights from Animal Mitochondrial DNA. *Annual Review of Ecology, Evolution,*  
861 *and Systematics*, 34(1), 397–423. doi: 10.1146/annurev.ecolsys.34.011802.132421

- 862 Galtier, N., Nabholz, B., Glémin, S., & Hurst, G. D. D. (2009). Mitochondrial DNA as a marker of  
863 molecular diversity: A reappraisal. *Molecular Ecology*, *18*(22), 4541–4550. doi: 10.1111/j.1365-  
864 294X.2009.04380.x
- 865 Gaunet, A., Dincă, V., Dapporto, L., Montagnud, S., Vodă, R., Schär, S., ... Vila, R. (2019). Two  
866 consecutive Wolbachia-mediated mitochondrial introgressions obscure taxonomy in Palearctic  
867 swallowtail butterflies (Lepidoptera, Papilionidae). *Zoologica Scripta*, *48*(4), 507–519. doi:  
868 <https://doi.org/10.1111/zsc.12355>
- 869 Gibbard, P. L., & Clark, C. D. (2011). Pleistocene glaciation limits in Great Britain. In *Developments in*  
870 *Quaternary Sciences* (Vol. 15, pp. 75–93). Elsevier.
- 871 Gruber, B., Unmack, P. J., Berry, O. F., & Georges, A. (2018). dartr: An r package to facilitate analysis  
872 of SNP data generated from reduced representation genome sequencing. *Molecular Ecology*  
873 *Resources*, *18*(3), 691–699. doi: 10.1111/1755-0998.12745
- 874 Han, K., Lee, H.-Y., Ro, N.-Y., Hur, O.-S., Lee, J.-H., Kwon, J.-K., & Kang, B.-C. (2018). QTL mapping and  
875 GWAS reveal candidate genes controlling capsaicinoid content in Capsicum. *Plant Biotechnology*  
876 *Journal*, *16*(9), 1546–1558. doi: 10.1111/pbi.12894
- 877 Hebert, P. D. N., Penton, E. H., Burns, J. M., Janzen, D. H., & Hallwachs, W. (2004). Ten species in one:  
878 DNA barcoding reveals cryptic species in the neotropical skipper butterfly *Astraptes fulgerator*.  
879 *Proceedings of the National Academy of Sciences*, *101*(41), 14812–14817. doi:  
880 10.1073/pnas.0406166101
- 881 Hewitt, G. M. (1999). Post-glacial re-colonization of European biota. *Biological Journal of the Linnean*  
882 *Society*, *68*(1), 87–112. doi: 10.1006/bjil.1999.0332
- 883 Hinojosa, J. C., Koubínová, D., Szenteczki, M. A., Pitteloud, C., Dincă, V., Alvarez, N., & Vila, R. (2019).  
884 A mirage of cryptic species: Genomics uncover striking mitonuclear discordance in the butterfly  
885 *Thymelicus sylvestris*. *Molecular Ecology*, *28*(17), 3857–3868. doi: 10.1111/mec.15153
- 886 Hiroki, M., Kato, Y., Kamito, T., & Miura, K. (2002). Feminization of genetic males by a symbiotic  
887 bacterium in a butterfly, *Eurema hecabe* (Lepidoptera: Pieridae). *Naturwissenschaften*, *89*(4), 167–  
888 170. doi: 10.1007/s00114-002-0303-5
- 889 Howe, P. D., Bryant, S. R., & Shreeve, T. G. (2007). Predicting body temperature and activity of adult  
890 *Polyommatus icarus* using neural network models under current and projected climate scenarios.  
891 *Oecologia*, *153*(4), 857–869. doi: 10.1007/s00442-007-0782-3
- 892 Hurst, G. D. D., & Jiggins, F. M. (2005). Problems with mitochondrial DNA as a marker in population,  
893 phylogeographic and phylogenetic studies: The effects of inherited symbionts. *Proceedings of the*  
894 *Royal Society B: Biological Sciences*, *272*(1572), 1525–1534. doi: 10.1098/rspb.2005.3056
- 895 Joyce, D. A., Dennis, R. L. H., Bryant, S. hR., Shreeve, T. H., Ready, J. S., & Pullin, A. S. (2009). Do  
896 taxonomic divisions reflect genetic differentiation? A comparison of morphological and genetic data  
897 in *Coenonympha tullia* (Müller), Satyrinae. *Biological Journal of the Linnean Society*, *97*(2), 314–327.  
898 doi: 10.1111/j.1095-8312.2009.01213.x

- 899 Joyce, D. A., & Pullin, A. S. (2001). Phylogeography of the Marsh Fritillary *Euphydryas aurinia*  
900 (Lepidoptera: Nymphalidae) in the UK. *Biological Journal of the Linnean Society*, 72(1), 129–141. doi:  
901 10.1111/j.1095-8312.2001.tb01305.x
- 902 Kageyama, D., Ohno, M., Sasaki, T., Yoshido, A., Konagaya, T., Jouraku, A., ... Sahara, K. (2017).  
903 Feminizing Wolbachia endosymbiont disrupts maternal sex chromosome inheritance in a butterfly  
904 species. *Evolution Letters*, 1(5), 232–244. doi: 10.1002/evl3.28
- 905 Kamvar, Z. N., Tabima, J. F., & Grünwald, N. J. (2014). Poppr: An R package for genetic analysis of  
906 populations with clonal, partially clonal, and/or sexual reproduction. *PeerJ*, 2, e281. doi:  
907 10.7717/peerj.281
- 908 Kato, Y. (2000). Overlapping Distribution of Two Groups of the Butterfly *Eurema hecabe* Differing in  
909 the Expression of Seasonal Morphs on Okinawa-jima Island. *Zoological Science*, 17(4), 539–547. doi:  
910 10.2108/0289-0003(2000)17[539:ODOTGO]2.0.CO;2
- 911 Kern, P., Cook, J. M., Kageyama, D., & Riegler, M. (2015). Double trouble: Combined action of meiotic  
912 drive and Wolbachia feminization in *Eurema* butterflies. *Biology Letters*, 11(5), 20150095. doi:  
913 10.1098/rsbl.2015.0095
- 914 Kim, D., Song, L., Breitwieser, F. P., & Salzberg, S. L. (2016). Centrifuge: Rapid and sensitive  
915 classification of metagenomic sequences. *Genome Research*, 26(12), 1721–1729. doi:  
916 10.1101/gr.210641.116
- 917 Lohman, D. J., Ingram, K. K., Prawiradilaga, D. M., Winker, K., Sheldon, F. H., Moyle, R. G., ... Meier, R.  
918 (2010). Cryptic genetic diversity in “widespread” Southeast Asian bird species suggests that  
919 Philippine avian endemism is gravely underestimated. *Biological Conservation*, 143(8), 1885–1890.  
920 doi: 10.1016/j.biocon.2010.04.042
- 921 Makepeace, B. L., & Gill, A. C. (2016). Wolbachia. In S. Thomas (Ed.), *Rickettsiales: Biology, Molecular*  
922 *Biology, Epidemiology, and Vaccine Development* (pp. 465–512). Cham: Springer International  
923 Publishing. doi: 10.1007/978-3-319-46859-4\_21
- 924 Malinsky, M., Trucchi, E., Lawson, D. J., & Falush, D. (2018). RADpainter and fineRADstructure:  
925 Population Inference from RADseq Data. *Molecular Biology and Evolution*, 35(5), 1284–1290. doi:  
926 10.1093/molbev/msy023
- 927 Matechou, E., Dennis, E. B., Freeman, S. N., & Brereton, T. (2014). Monitoring abundance and  
928 phenology in (multivoltine) butterfly species: A novel mixture model. *Journal of Applied Ecology*,  
929 51(3), 766–775. doi: 10.1111/1365-2664.12208
- 930 Mendoza, Á. M., Torres, M. F., Paz, A., Trujillo-Arias, N., López-Alvarez, D., Sierra, S., ... Gonzalez, M.  
931 A. (2016). Cryptic diversity revealed by DNA barcoding in Colombian illegally traded bird species.  
932 *Molecular Ecology Resources*, 16(4), 862–873. doi: 10.1111/1755-0998.12515
- 933 Michaux, J. R., Libois, R., & Filippucci, M.-G. (2005). So close and so different: Comparative  
934 phylogeography of two small mammal species, the Yellow-necked fieldmouse ( *Apodemus flavicollis*  
935 ) and the Woodmouse ( *Apodemus sylvaticus* ) in the Western Palearctic region. *Heredity*, 94(1), 52–  
936 63. doi: 10.1038/sj.hdy.6800561

- 937 Miller, S. A., Dykes, D. D., & Polesky, H. F. (1988). A simple salting out procedure for extracting DNA  
938 from human nucleated cells. *Nucleic Acids Research*, *16*(3), 1215–1215. doi: 10.1093/nar/16.3.1215
- 939 Mutanen, M., Hausmann, A., Hebert, P. D. N., Landry, J.-F., Waard, J. R. de, & Huemer, P. (2012).  
940 Allopatry as a Gordian Knot for Taxonomists: Patterns of DNA Barcode Divergence in Arctic-Alpine  
941 Lepidoptera. *PLOS ONE*, *7*(10), e47214. doi: 10.1371/journal.pone.0047214
- 942 Narita, S., Kageyama, D., Nomura, M., & Fukatsu, T. (2007). Unexpected Mechanism of Symbiont-  
943 Induced Reversal of Insect Sex: Feminizing Wolbachia Continuously Acts on the Butterfly *Eurema*  
944 *hecabe* during Larval Development. *Applied and Environmental Microbiology*, *73*(13), 4332–4341.  
945 doi: 10.1128/AEM.00145-07
- 946 Paradis, E., & Schliep, K. (2019). ape 5.0: An environment for modern phylogenetics and evolutionary  
947 analyses in R. *Bioinformatics*, *35*(3), 526–528. doi: 10.1093/bioinformatics/bty633
- 948 Paris, J. R., Stevens, J. R., & Catchen, J. M. (2017). Lost in parameter space: A road map for stacks.  
949 *Methods in Ecology and Evolution*, *8*(10), 1360–1373. doi: 10.1111/2041-210X.12775
- 950 Petit, R. J., Aguinagalde, I., de Beaulieu, J.-L., Bittkau, C., Brewer, S., Cheddadi, R., ... Vendramin, G. G.  
951 (2003). Glacial refugia: Hotspots but not melting pots of genetic diversity. *Science (New York, N.Y.)*,  
952 *300*(5625), 1563–1565. doi: 10.1126/science.1083264
- 953 Provan, J., & Bennett, K. D. (2008). Phylogeographic insights into cryptic glacial refugia. *Trends in*  
954 *Ecology & Evolution*, *23*(10), 564–571. doi: 10.1016/j.tree.2008.06.010
- 955 R Core Team. (2019). R: A language and environment for statistical computing (Version 3.6.2).  
956 Vienna, Austria: R Foundation for Statistical Computing. Retrieved from <https://www.R-project.org/>
- 957 Ratnasingham, S., & Herbert, P. D. N. (2007). bold: The Barcode of Life Data System  
958 (<http://www.barcodinglife.org>). *Molecular Ecology Notes*, *7*(3), 355–364. doi: 10.1111/j.1471-  
959 8286.2007.01678.x
- 960 Richardson, M. F., Weinert, L. A., Welch, J. J., Linheiro, R. S., Magwire, M. M., Jiggins, F. M., &  
961 Bergman, C. M. (2012). Population Genomics of the Wolbachia Endosymbiont in *Drosophila*  
962 *melanogaster*. *PLOS Genetics*, *8*(12), e1003129. doi: 10.1371/journal.pgen.1003129
- 963 Rochette, N. C., & Catchen, J. M. (2017). Deriving genotypes from RAD-seq short-read data using  
964 Stacks. *Nature Protocols*, *12*(12), 2640–2659. doi: 10.1038/nprot.2017.123
- 965 Scalercio, S., Cini, A., Menchetti, M., Vodă, R., Bonelli, S., Bordoni, A., ... Dapporto, L. (2020). How  
966 long is 3 km for a butterfly? Ecological constraints and functional traits explain high mitochondrial  
967 genetic diversity between Sicily and the Italian Peninsula. *Journal of Animal Ecology*, *89*(9), 2013–  
968 2026. doi: 10.1111/1365-2656.13196
- 969 Schmitt, T. (2007). Molecular biogeography of Europe: Pleistocene cycles and postglacial trends.  
970 *Frontiers in Zoology*, *4*(1), 11. doi: 10.1186/1742-9994-4-11
- 971 Schmitt, T., & Varga, Z. (2012). Extra-Mediterranean refugia: The rule and not the exception?  
972 *Frontiers in Zoology*, *9*(1), 22. doi: 10.1186/1742-9994-9-22



- 973 Searle, J. B., Kotlík, P., Rambau, R. V., Marková, S., Herman, J. S., & McDevitt, A. D. (2009). The Celtic  
974 fringe of Britain: Insights from small mammal phylogeography. *Proceedings of the Royal Society B:*  
975 *Biological Sciences*, 276(1677), 4287–4294. doi: 10.1098/rspb.2009.1422
- 976 Seddon, J. M., Santucci, F., Reeve, N. J., & Hewitt, G. M. (2001). DNA footprints of European  
977 hedgehogs, *Erinaceus europaeus* and *E. concolor*: Pleistocene refugia, postglacial expansion and  
978 colonization routes. *Molecular Ecology*, 10(9), 2187–2198. doi: 10.1046/j.0962-1083.2001.01357.x
- 979 Smith, M. A., Woodley, N. E., Janzen, D. H., Hallwachs, W., & Hebert, P. D. N. (2006). DNA barcodes  
980 reveal cryptic host-specificity within the presumed polyphagous members of a genus of parasitoid  
981 flies (Diptera: Tachinidae). *Proceedings of the National Academy of Sciences of the United States of*  
982 *America*, 103(10), 3657. doi: 10.1073/pnas.0511318103
- 983 Stouthamer, R., Breeuwer, J. A. J., & Hurst, G. D. D. (1999). *Wolbachia Pipientis*: Microbial  
984 Manipulator of Arthropod Reproduction. *Annual Review of Microbiology*, 53(1), 71–102. doi:  
985 10.1146/annurev.micro.53.1.71
- 986 Sucháčková Bartoňová, A., Konvička, M., Marešová, J., Wiemers, M., Ignatev, N., Wahlberg, N., ...  
987 Faltýnek Fric, Z. (2021). *Wolbachia* affects mitochondrial population structure in two systems of  
988 closely related Palaearctic blue butterflies. *Scientific Reports*, 11(1), 3019. doi: 10.1038/s41598-021-  
989 82433-8
- 990 Sutherland, B. L., Quarles, B. M., & Galloway, L. F. (2018). Intercontinental dispersal and whole-  
991 genome duplication contribute to loss of self-incompatibility in a polyploid complex. *American*  
992 *Journal of Botany*, 105(2), 249–256. doi: <https://doi.org/10.1002/ajb2.1027>
- 993 Telschow, A., Yamamura, N., & Werren, J. H. (2005). Bidirectional cytoplasmic incompatibility and  
994 the stable coexistence of two *Wolbachia* strains in parapatric host populations. *Journal of*  
995 *Theoretical Biology*, 235(2), 265–274. doi: 10.1016/j.jtbi.2005.01.008
- 996 Toews, D. P. L., & Brelsford, A. (2012). The biogeography of mitochondrial and nuclear discordance in  
997 animals. *Molecular Ecology*, 21(16), 3907–3930. doi: 10.1111/j.1365-294X.2012.05664.x
- 998 Tóth, J. P., Varga, Z., Verovnik, R., Wahlberg, N., Váradi, A., & Bereczki, J. (2017). Mito-nuclear  
999 discordance helps to reveal the phylogeographic patterns of *Melitaea ornata* (Lepidoptera:  
1000 Nymphalidae). *Biological Journal of the Linnean Society*, 121(2), 267–281. doi:  
1001 10.1093/biolinnean/blw037
- 1002 Traut, W., Sahara, K., & Marec, F. (2007). Sex Chromosomes and Sex Determination in Lepidoptera.  
1003 *Sexual Development*, 1(6), 332–346. doi: 10.1159/000111765
- 1004 Werren, J. H., Baldo, L., & Clark, M. E. (2008). *Wolbachia*: Master manipulators of invertebrate  
1005 biology. *Nature Reviews Microbiology*, 6(10), 741–751. doi: 10.1038/nrmicro1969
- 1006 Whitlock, M. C., & Lotterhos, K. E. (2015). Reliable Detection of Loci Responsible for Local  
1007 Adaptation: Inference of a Null Model through Trimming the Distribution of FST. *The American*  
1008 *Naturalist*, 186(S1), S24–S36. doi: 10.1086/682949

1009 Wilson, J., Perry, A., Shepherd, J. R., Durán-Castillo, M., Jeffree, C. E., & Cavers, S. (2020). Invasion,  
1010 isolation and evolution shape population genetic structure in *Campanula rotundifolia*. *AoB PLANTS*,  
1011 12(plaa011). doi: 10.1093/aobpla/plaa011

1012

### 1013 **Data Availability Statement**

1014 *CO1* sequence data are publicly available from NCBI or BOLD with individuals accession numbers  
1015 available in Table S1. Additional *CO1* sequences generated for this study are deposited in NCBI  
1016 Genbank with accession numbers also listed in Table S1. Raw ddRADSeq reads have been  
1017 deposited on the NCBI SRA under the project accession PRJNAXXXX. Barcodes for de-multiplexing  
1018 illumina data, processed data files and Bash scripts for the genotype calls and analyses can be found  
1019 on github/xxxx.

1020

1021

1022

1023

1024

1025

1026

1027

1028

1029

1030

1031

1032

1033

1034

1035

1036

1037

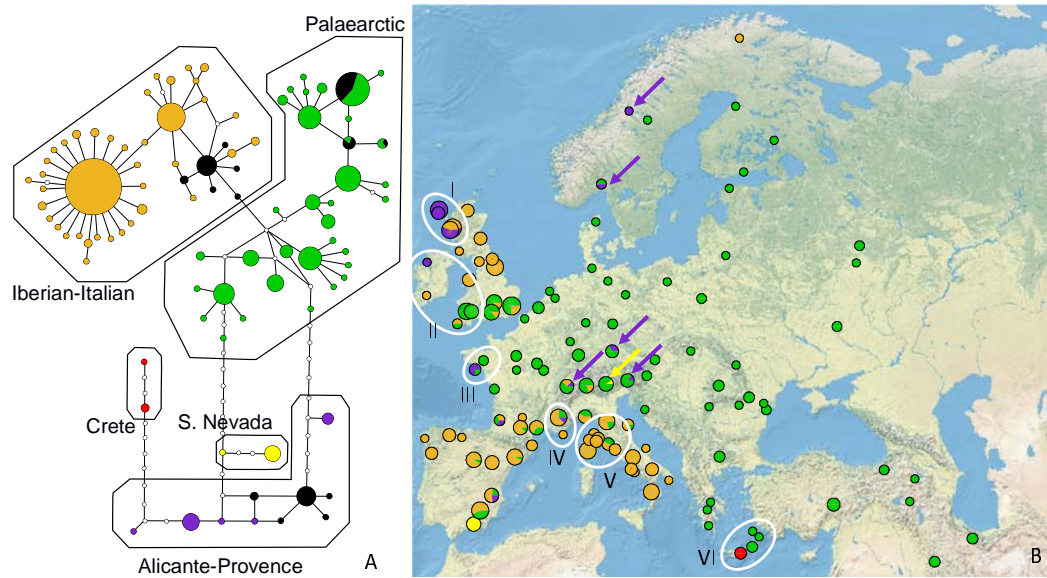

1038

1039 **Figure 1.** The haplotype network based on COI and divided in five main haplogroups according to a  
1040 division in a UPGMA clustering which aligns to previous assessments **(A)**. Specimens in black belong  
1041 to British islands. The collection sites of the specimens included in the haplotype network (same  
1042 colours as in A) are also mapped **(B)**. Specimens are grouped in pie charts for squares of 2x2  
1043 degrees of latitude-longitude and circle area is proportional to the number of specimens. The  
1044 systems of island-mainland (or larger island) are indicated with roman numbers (I, Hebrides-Britain; II,  
1045 Ireland-Britain; III, Belle-Île-en-Mer-France mainland; IV, Levant island-France mainland; V,  
1046 Tyrrhenian islands-Italian mainland; VI Crete-neighbouring islands-Greek and Turkish mainland.  
1047 Many specimens with haplotypes regarded as relict from past colonization waves are also found in  
1048 Central Europe and Middle East and highlighted with arrows.

1049

1050

1051

1052

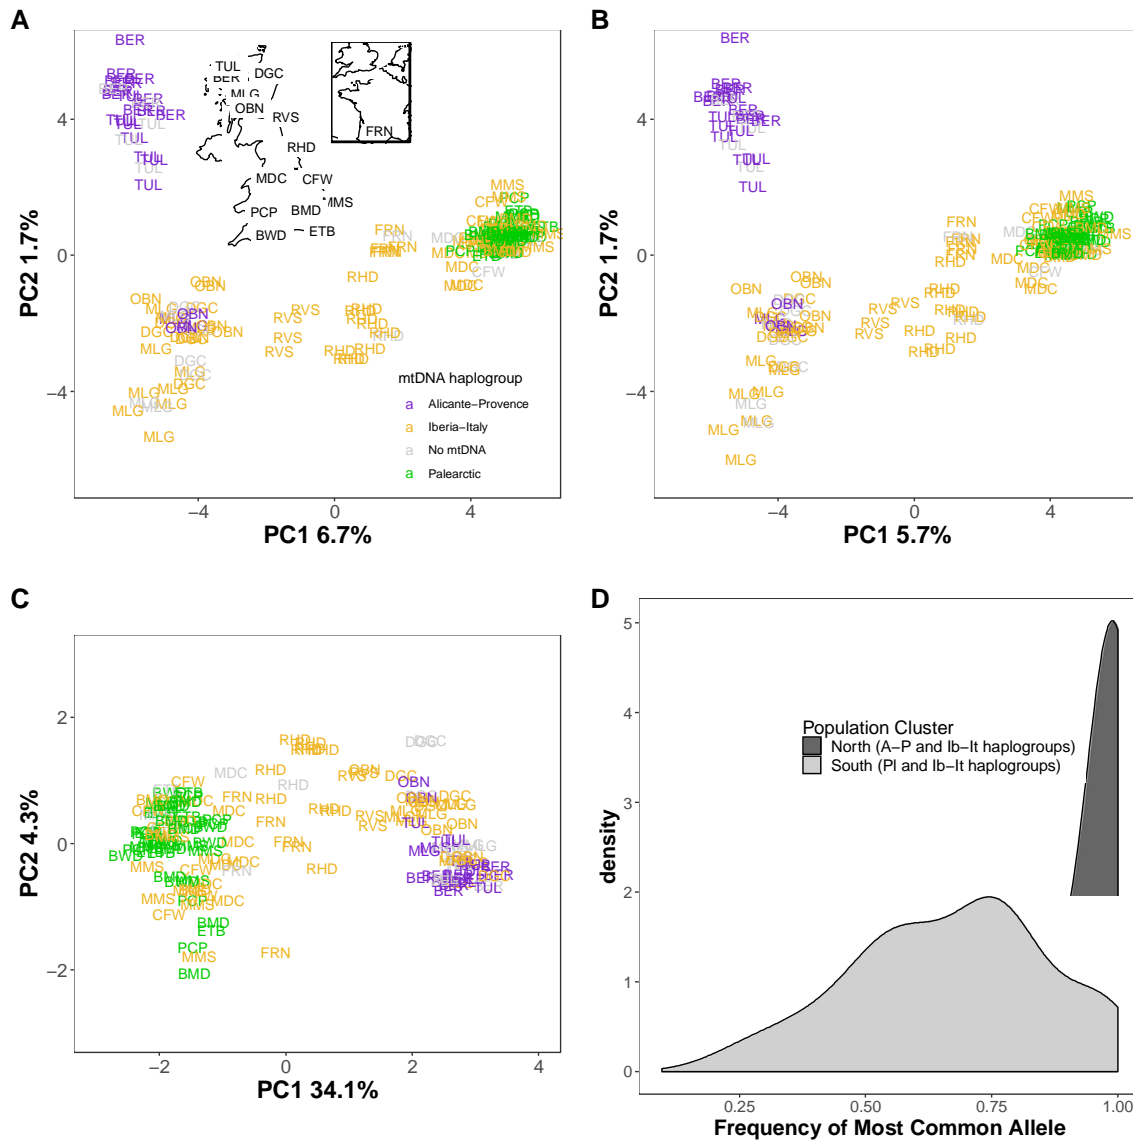

1053

1054

1055

1056

1057 **Figure 2** Population structure based on principal component analysis (PCA) of 5592 SNPs (2824  
 1058 RAD loci) of 148 *Polyommatus icarus* individuals across the British Isles. PCAs are shown for the  
 1059 entire dataset (**A**), a subset of 5387 putatively neutral SNPs (**B**), and a subset of 104 outlier SNPs  
 1060 (across 84 RAD loci) (**C**). (**A**) inset is a labelled map of the sampled localities for quick reference.  
 1061 Populations are coloured by their mtDNA haplogroup, where data is available, to help visualize  
 1062 concordance between mtDNA and genomic markers. (D) Density distributions of the frequency of the  
 1063 most common allele (MCA) for the 104 outlier SNPs across northern and southern British Isles.  
 1064 Individual sampling locations are aggregated by geographic clustering of localities along PCA 1 in **A**-  
 1065 **C** (**A-P**: Alicante-Provence, **Ib-It**: Iberia-Italy, **PI**: Palearctic). Localities in intermediate positions  
 1066 (RHD, RVS) and reference outgroups (FRN) were excluded. North: TUL, BER, 13 DGC, MLG, OBN;  
 1067 South: MDC, CFW, MMS, PCP, BMD, ETB.

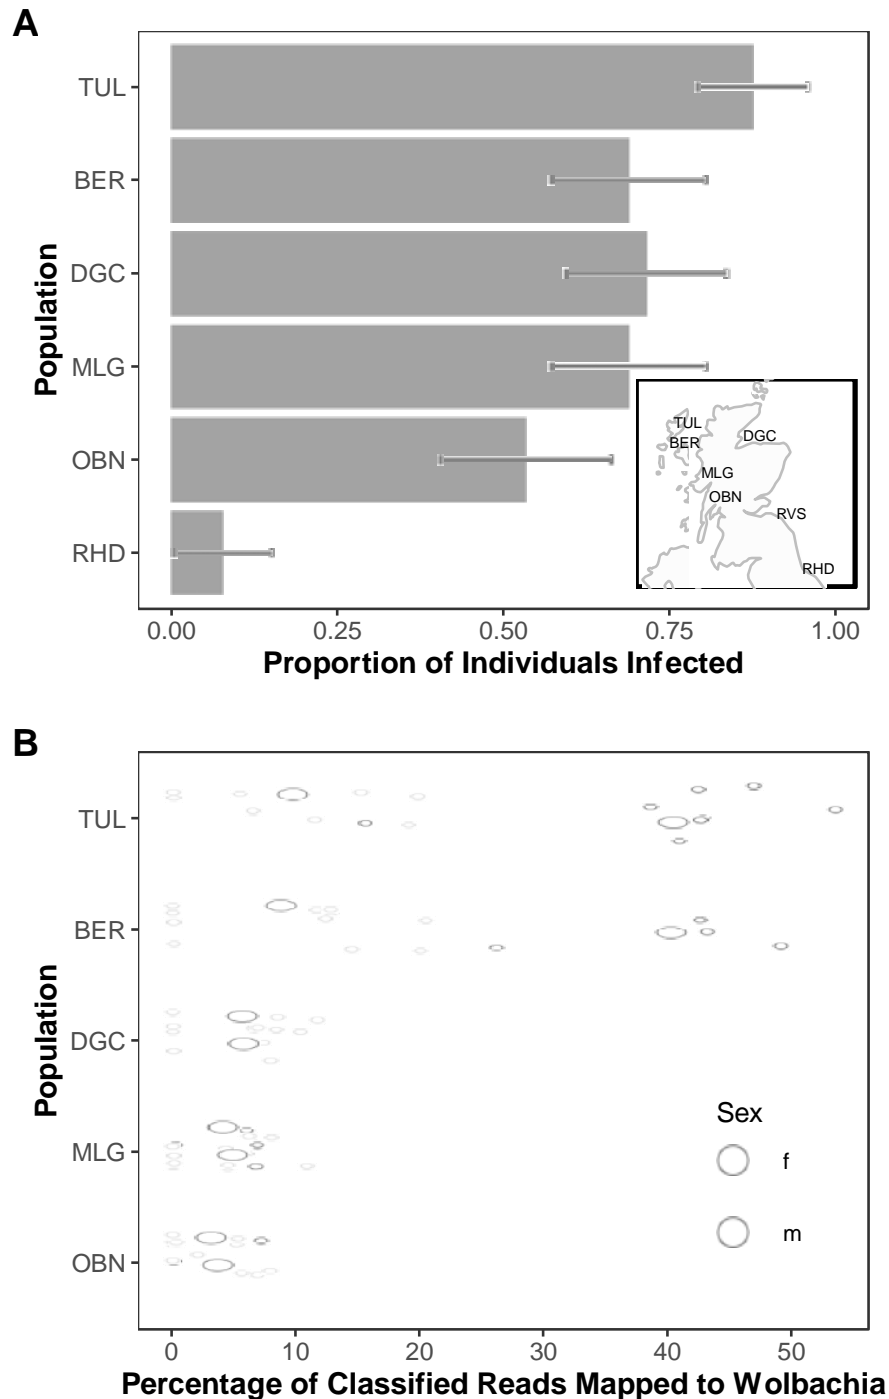

1068

1069

1070

1071

1072

1073

1074

1075

**Figure 3. (A).** Proportion of individuals classified as infected based on a threshold of  $\log_2(\text{percentage of classified reads mapping to Wolbachia}) > 0$ . Only populations with at least one infected individual are shown. Error bars are the standard errors of the estimated proportions. Inset map spans the geographical range of locations harbouring infected individuals. **(B).** Distributions of the percentage of classified reads mapping to *Wolbachia* for locations with individuals classified as infected. RHD with a single infected male is not shown. Larger circles represent the average for each sex within locations.

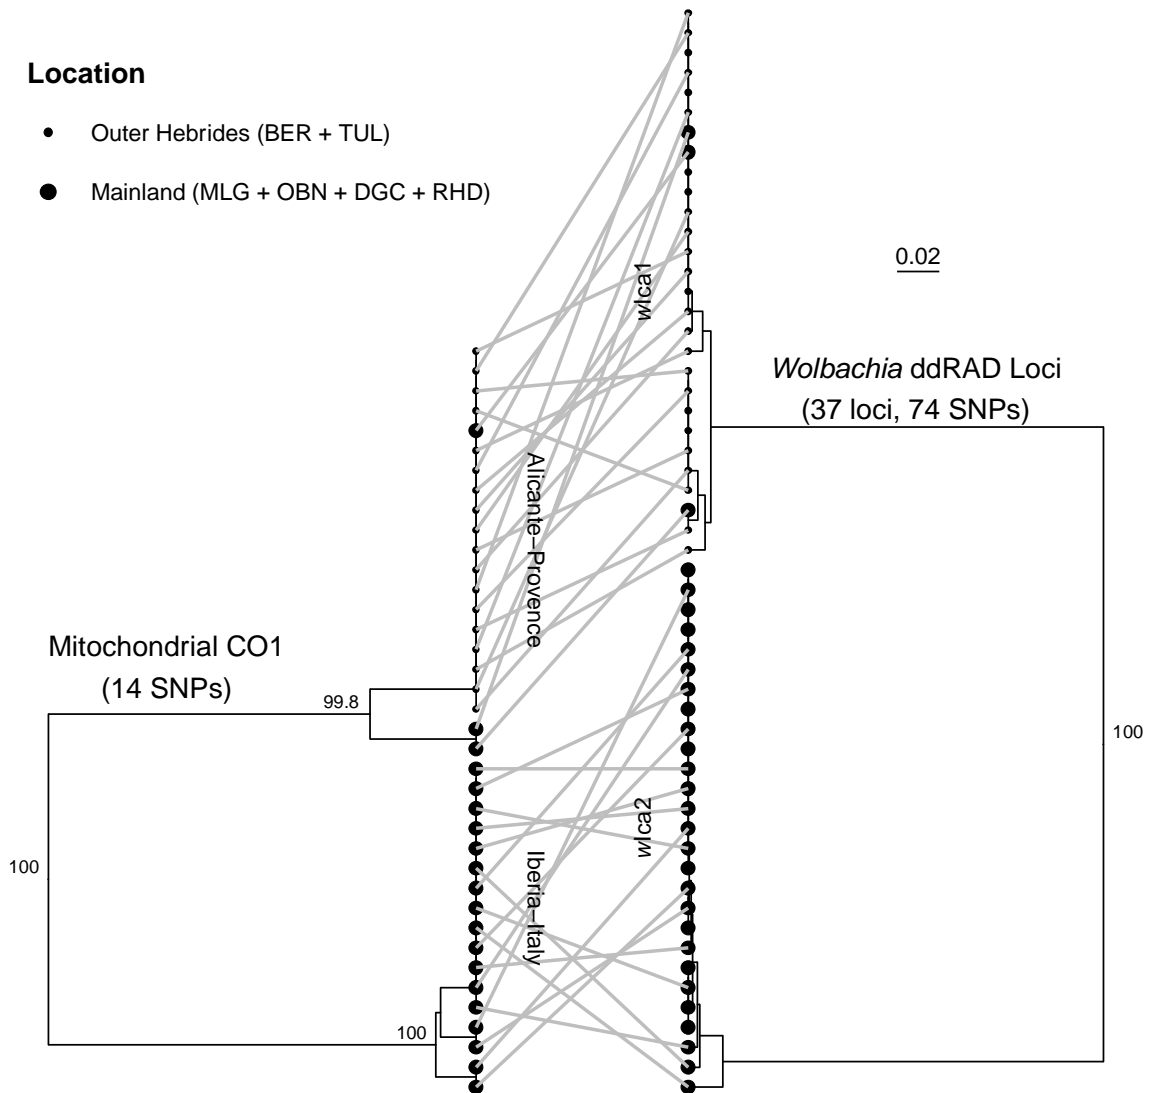

1076

1077 **Figure 4.** UPGMA clustering of mitochondrial CO1 fragments from 38 *Polyommatus icarus* individuals  
1078 based on bitwise distance (left). UPGMA clustering of 74 concatenated SNPs from ddRADseq  
1079 *Wolbachia* genotypes derived from reads mapping to *Wolbachia* from 55 infected individuals (right).  
1080 Numbers on nodes represent bootstrap branch support values based on 1000 bootstrap replicates,  
1081 values < 70% are not shown. Large circles represent individuals from mainland populations (DGC,  
1082 MLG, OBN, RHD) and smaller circles represent individuals from the Outer Hebrides (BER, TUL).  
1083 Lines between dendrograms connect the CO1 haplotype and *Wolbachia* strain for the same individual.  
1084 Scale bar reflects the proportion of loci that are different.

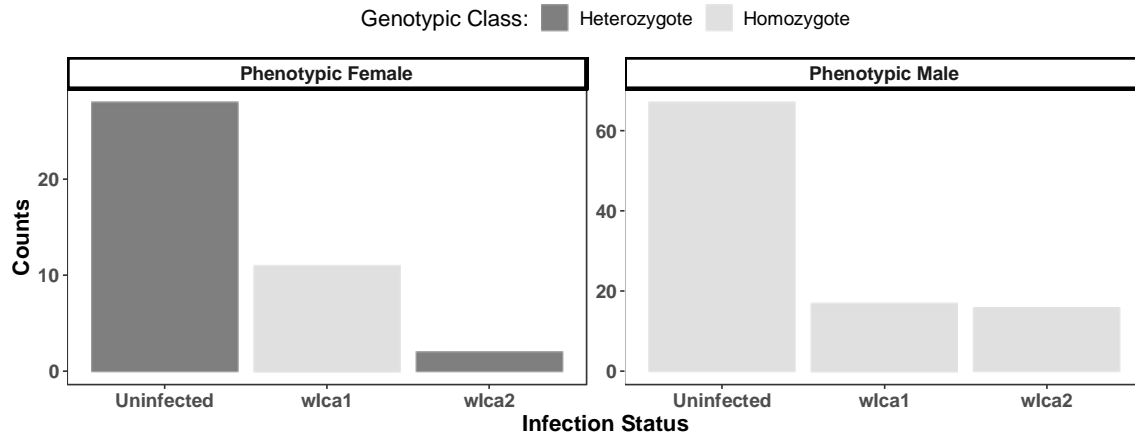

1085

1086

1087 **Figure 5.** Feminization of *wIca1* infected females as suggested by discordance between  
1088 morphological sex, based on abdominal tip morphology and dimorphic wing patterning, and genetic  
1089 sex based on female-specific markers. Discordance is exemplified by data on a single marker here  
1090 (11011\_27), see Table S7 for all sex-linked loci. All *wIca1* infected morphological females (all females  
1091 in the Outer Hebrides and one from the mainland (MLGf010) are homozygous for female-specific  
1092 markers (heterozygous ZW), consistent with feminization of males.
